# Supplementary material
Source: ML conference proceedings conference paper supplement (https://openreview.net/forum?id=d6wOZrzaWd)
Supplement: supplementary_material [file Equivariance_Everywhere_All_At_Once_A_Recipe_for_Graph_Foundation_Models___Appendix_only.pdf › Equivariance_Everywhere_All_At_Once_A_Recipe_for_Graph_Foundation_Models___Appendix_only.pdf]

## A Proof of Proposition 4.1

### A.1 A Primer on Representation Theory

Let  $\text{GL}(V)$  denote the general linear group of invertible linear transformations on the vector space  $V$ . Contrarily to the notations defined in Section 2, the vector of  $N$  ones and the all-ones  $N \times M$  matrix are denoted by  $\mathbf{1}_N$  and  $\mathbf{1}_{N,M}$ , respectively.

**A group homomorphism.** Let  $G$  and  $H$  be groups. A *group homomorphism* is a function  $\phi : G \rightarrow H$  that preserves the group operation, meaning that for all  $g_1, g_2 \in G$ ,  $\phi(g_1 \cdot g_2) = \phi(g_1) \cdot \phi(g_2)$ . Additionally, a homomorphism satisfies: For all  $g \in G$ ,  $\phi(g^{-1}) = (\phi(g))^{-1}$  and  $\phi(e_G) = e_H$ , where  $e_G$  and  $e_H$  are the identity elements of  $G$  and  $H$ , respectively.

**A representation.** Let  $G$  be a group and let  $V$  be a vector space over a field  $\mathbb{F}$ . Let  $\rho : G \rightarrow \text{GL}(V)$  be a group homomorphism. Then a *representation* of  $G$  is the pair  $(V, \rho)$ .

**An invariant subspace.** Let  $G$  be a group. Let  $(V, \rho)$  be a representation. A subspace  $W \subseteq V$  is called an *invariant subspace* for  $\rho$  if for every  $g \in G$  and  $w \in W$ ,  $\rho(g)w \in W$  holds.

**A subrepresentation.** Let  $G$  be a group. Let  $(V, \rho)$  be a representation. Let  $W \subseteq V$  be an invariant subspace for  $\rho$ . Then,  $(W, \rho_W)$  is a subrepresentation of  $(V, \rho)$ , where the restriction of  $\rho$  to  $W$  defines the representation  $\rho_W : G \rightarrow \text{GL}(W)$ . **Irreducible and completely reducible representations.** If  $V$  has no nontrivial subrepresentations (i.e., the only invariant subspaces are  $\{0\}$  and  $V$ ), then  $(V, \rho)$  is called **irreducible**. The representation  $(V, \rho)$  is said to be **completely reducible** if  $V = V_1 \oplus V_2 \oplus \dots \oplus V_k$ , where each  $(V_i, \rho_{V_i})$  is an irreducible representations. For brevity, we refer to a representation  $(V_i, \rho_{V_i})$  by  $(V_i, \rho)$ .

**$G$ -equivariance over representations.** Let  $G$  be a group. Let  $(V, \rho_V)$  and  $(W, \rho_W)$  be representations of  $G$ . We say that a function  $f : V \rightarrow W$  is  *$G$ -equivariant with respect to  $\rho_V$  and  $\rho_W$*  if

$$\forall g \in G, v \in V \quad f(\rho_V(g)v) = \rho_W(g)f(v).$$

We can now detail a classical result in representation theory that is later used to derive the irreducible representations that are  $(S_F \times S_C)$ -equivariant.

**Lemma A.1.** *The vector space  $\mathbb{R}^N$  can be decomposed the  $S_N$ -invariant subspaces  $V_1^N \oplus V_0^N$  such that*

$$\mathbb{R}^N \cong V_1^N \oplus V_0^N,$$

where the one-dimensional  $V_1^N = \{c \cdot \mathbf{1}_N \mid c \in \mathbb{R}\}$  is denoted as the trivial irreducible representation and the  $(N-1)$ -dimensional  $V_0^N = \{\mathbf{x} \in \mathbb{R}^N \mid \mathbf{1}_N^\top \mathbf{x} = 0\}$  is denoted as the standard irreducible representation, which is the orthogonal complement to  $V_1^N$ .

After we obtain all the irreducible representations we employ Schur's lemma to derive all linear layers that are  $(S_F \times S_C)$ -equivariant.

**Lemma A.2 (Schur's lemma).** *Let  $G$  be a group. Let  $(V, \rho_V)$  and  $(W, \rho_W)$  be finite-dimensional irreducible representations of  $G$ . Suppose a linear map  $L : V \rightarrow W$  is  $G$ -equivariant with respect to  $\rho_V$  and  $\rho_W$ . Then,*

1. *If  $V$  and  $W$  are non-isomorphic, then  $L = 0$ .*

2. *If  $V = W$ , then  $L$  is a scalar multiple of the identity, i.e., there exists  $\lambda \in \mathbb{N}$  such that  $L = \lambda I_V$ .*

## 825 A.2 Proof of Proposition 4.1

826 In this section we prove an extension of Proposition 4.1.

827 **Proposition 4.1.** *A linear function of the form*

$$T = (T_1, T_2): \mathbb{R}^{K_1 \times N \times F} \times \mathbb{R}^{K_1 \times N \times C} \rightarrow \mathbb{R}^{K_2 \times N \times F} \times \mathbb{R}^{K_2 \times N \times C}$$

828 *is  $(S_N \times S_F \times S_C)$ -equivariant if and only if there exist  $\Lambda^{(1)}, \dots, \Lambda^{(12)} \in \mathbb{R}^{K_2 \times K_1}$  such that for*  
 829 *every  $\mathbf{X} \in \mathbb{R}^{K_1 \times N \times F}$ ,  $\mathbf{Y} \in \mathbb{R}^{K_1 \times N \times C}$  and  $k_2 \in [K_2]$ , we have*

$$\begin{aligned} \forall i \in [6], \quad \mathbf{X}_{k_2}^{(i)} &= \sum_{k_1=0}^{K_1} \Lambda_{k_2, k_1}^{(i)} \mathbf{X}_{k_1}, \quad \mathbf{Y}_{k_2}^{(i)} = \sum_{k_1=0}^{K_1} \Lambda_{k_2, k_1}^{(i+6)} \mathbf{Y}_{k_1} \\ T_1(\mathbf{X}, \mathbf{Y})_{k_2} &= \left( \mathbf{1}_{N, N} \mathbf{X}_{k_2}^{(1)} + \mathbf{X}_{k_2}^{(2)} \right) \mathbf{1}_{F, F} + \mathbf{1}_{N, N} \mathbf{X}_{k_2}^{(3)} + \mathbf{X}_{k_2}^{(4)} + \left( \mathbf{1}_{N, N} \mathbf{Y}_{k_2}^{(5)} + \mathbf{X}_{k_2}^{(6)} \right) \mathbf{1}_{C, F}, \\ T_2(\mathbf{X}, \mathbf{Y})_{k_2} &= \left( \mathbf{1}_{N, N} \mathbf{Y}_{k_2}^{(1)} + \mathbf{Y}_{k_2}^{(2)} \right) \mathbf{1}_{C, C} + \mathbf{1}_{N, N} \mathbf{Y}_{k_2}^{(3)} + \mathbf{Y}_{k_2}^{(4)} + \left( \mathbf{1}_{N, N} \mathbf{X}_{k_2}^{(5)} + \mathbf{X}_{k_2}^{(6)} \right) \mathbf{1}_{F, C}, \end{aligned}$$

830 *where  $T_1(\mathbf{X}, \mathbf{Y}) \in \mathbb{R}^{K_2 \times N \times F}$  and  $T_2(\mathbf{X}, \mathbf{Y}) \in \mathbb{R}^{K_2 \times N \times C}$ .*

831 **Proof.** **The irreducibles of  $\mathbb{R}^{K \times N \times (F+C)}$ .** We view  $\mathbb{R}^{F+C}$  as the direct product of three coordinate  
 832 subspaces

$$\mathbb{R}^{K \times N \times (F+C)} = \mathbb{R}^K \otimes \mathbb{R}^N \otimes \mathbb{R}^{F+C} \quad (4)$$

833 The group  $S_N \times (S_F \times S_C)$  acts naturally on this space, where  $S_N$  acts by permuting the coordinates  
 834 of  $\mathbb{R}^N$ , and  $S_F \times S_C$  acts on  $\mathbb{R}^{F+C}$ .

835 By Lemma A.1, the vector space  $\mathbb{R}^N$  is composed of the irreducibles  $V_1^N$  and  $V_0^N$ , i.e.

$$\mathbb{R}^N = V_1^N \oplus V_0^N \quad (5)$$

836 Since no symmetry group acts on the channel axis  $\mathbb{R}^K$ , the corresponding representation is trivial.  
 837 Consequently,  $\mathbb{R}^K$  decomposes as the direct sum of  $K$  one-dimensional trivial representations

$$\mathbb{R}^K = \bigoplus_{k=1}^K E^k, \quad (6)$$

838 where each  $E^k = \{c \cdot e_k \mid c \in \mathbb{R}\} \subset \mathbb{R}^K$  is a 1-dimensional subspace invariant under the identity  
 839 action, and  $e_{k=1}^K$  denotes the standard basis of  $\mathbb{R}^K$ .

840 **The irreducibles of  $\mathbb{R}^{F+C}$ .** We view  $\mathbb{R}^{F+C}$  as the direct sum of two coordinate subspaces:  $\mathbb{R}^F \oplus \mathbb{R}^C$ .  
 841 The group  $S_F \times S_C$  acts naturally on this space, where  $S_F$  acts by permuting the coordinates of  $\mathbb{R}^F$ ,  
 842 and  $S_C$  acts similarly on  $\mathbb{R}^C$ .

843 By Lemma A.1, the vector space  $\mathbb{R}^F$  is composed of the irreducibles  $V_1^F$  and  $V_0^F$ . Similarly, the  
 844 vector space  $\mathbb{R}^C$  is composed of the irreducibles  $V_1^C$  and  $V_0^C$ . Thus,

$$\mathbb{R}^{F+C} = V_1^F \oplus V_0^F \oplus V_1^C \oplus V_0^C. \quad (7)$$

845 Denote, for all  $k \in [K]$  the following irreducible representations

$$\begin{aligned} V_{1,1}^{N,F,k} &= V_1^N \oplus V_1^F \oplus E^k, & V_{1,0}^{N,F,k} &= V_1^N \oplus V_0^F \oplus E^k, \\ V_{1,1}^{N,C,k} &= V_1^N \oplus V_1^C \oplus E^k, & V_{1,0}^{N,C,k} &= V_1^N \oplus V_0^C \oplus E^k, \\ V_{0,1}^{N,F,k} &= V_0^N \oplus V_1^F \oplus E^k, & V_{0,0}^{N,F,k} &= V_0^N \oplus V_0^F \oplus E^k, \\ V_{0,1}^{N,C,k} &= V_0^N \oplus V_1^C \oplus E^k, & V_{0,0}^{N,C,k} &= V_0^N \oplus V_0^C \oplus E^k, \end{aligned}$$

846 with dimensions

$$\begin{aligned} \dim(V_{1,1}^{(N,F,k)}) &= 1, & \dim(V_{1,0}^{(N,F,k)}) &= F - 1, \\ \dim(V_{1,1}^{(N,C,k)}) &= 1, & \dim(V_{1,0}^{(N,C,k)}) &= C - 1, \\ \dim(V_{0,1}^{(N,F,k)}) &= N - 1, & \dim(V_{0,0}^{(N,F,k)}) &= (N - 1)(F - 1), \\ \dim(V_{0,1}^{(N,C,k)}) &= N - 1, & \dim(V_{0,0}^{(N,C,k)}) &= (N - 1)(C - 1). \end{aligned}$$

847 By substituting Equations (5) to (7) into Equation (4), we get

$$\mathbb{R}^{K \times N \times (F+C)} = (V_1^N \oplus V_0^N) \otimes (V_1^F \oplus V_0^F \oplus V_1^C \oplus V_0^C) \bigoplus_{k=1}^K E^k$$

848

$$= \bigoplus_{k=1}^K \left( V_{1,1}^{N,F,k} \oplus V_{1,0}^{N,F,k} \oplus V_{1,1}^{N,F,k} \oplus V_{1,0}^{N,F,k} \oplus V_{1,1}^{N,C,k} \oplus V_{1,0}^{N,C,k} \oplus V_{1,1}^{N,C,k} \oplus V_{1,0}^{N,C,k} \right).$$

849 **The equivariant linear maps from  $\mathbb{R}^{K_1 \times N \times (F+C)}$  to  $\mathbb{R}^{K_2 \times N \times (F+C)}$ .** We denote the irreducible  
850 components of  $\mathbb{R}^{K_1 \times N \times (F+C)}$  by

$$V_{1,1}^{N,F,k_1}, V_{1,0}^{N,F,k_1}, V_{1,1}^{N,F,k_1}, V_{1,0}^{N,F,k_1}, V_{1,1}^{N,C,k_1}, V_{1,0}^{N,C,k_1}, V_{1,1}^{N,C,k_1}, V_{1,0}^{N,C,k_1}$$

851 for each  $k_1 \in [K_1]$  and similarly for  $\mathbb{R}^{K_2 \times N \times (F+C)}$ .

852 By Schur's lemma Lemma A.2, any equivariant linear map between non-isomorphic irreducible  
853 representations must be the zero map. Therefore, we restrict our attention to the linear maps between  
854 isomorphic irreducibles for each  $k_1 \in [K_1], k_2 \in [K_2]$

$$\begin{aligned} L_1^{k_1,k_2} : V_{1,1}^{N,F,k_1} &\rightarrow V_{1,1}^{N,F,k_2}, & L_2^{k_1,k_2} : V_{0,1}^{N,F,k_1} &\rightarrow V_{0,1}^{N,F,k_2}, \\ L_3^{k_1,k_2} : V_{1,0}^{N,F,k_1} &\rightarrow V_{0,0}^{N,F,k_2}, & L_4^{k_1,k_2} : V_{0,0}^{N,F,k_1} &\rightarrow V_{0,0}^{N,F,k_2}, \\ L_5^{k_1,k_2} : V_{1,1}^{N,F,k_1} &\rightarrow V_{1,1}^{N,C,k_2}, & L_6^{k_1,k_2} : V_{0,1}^{N,F,k_1} &\rightarrow V_{0,1}^{N,C,k_2}, \\ L_7^{k_1,k_2} : V_{1,1}^{N,C,k_1} &\rightarrow V_{1,1}^{N,C,k_2}, & L_8^{k_1,k_2} : V_{0,1}^{N,C,k_1} &\rightarrow V_{0,1}^{N,C,k_2}, \\ L_9^{k_1,k_2} : V_{1,0}^{N,C,k_1} &\rightarrow V_{0,0}^{N,C,k_2}, & L_{10}^{k_1,k_2} : V_{0,0}^{N,C,k_1} &\rightarrow V_{0,0}^{N,C,k_2}, \\ L_{11}^{k_1,k_2} : V_{1,1}^{N,C,k_1} &\rightarrow V_{1,1}^{N,F,k_2}, & L_{12}^{k_1,k_2} : V_{0,1}^{N,C,k_1} &\rightarrow V_{0,1}^{N,F,k_2}, \end{aligned}$$

855 Following the respective definitions of the irreducibles these linear layers take the forms for every  
856  $\mathbf{X} \in \mathbb{R}^{K_1 \times N \times F}, \mathbf{Y} \in \mathbb{R}^{K_1 \times N \times C}$ :

$$\begin{aligned} L_1^{k_1,k_2}(\mathbf{X}, \mathbf{Y}) &= \lambda_1^{k_1,k_2} \mathbf{1}_{N,N} \mathbf{X} \mathbf{1}_{F,F}, & L_2^{k_1,k_2}(\mathbf{X}, \mathbf{Y}) &= \lambda_2^{k_1,k_2} (\mathbf{X} - \mathbf{1}_{N,N} \mathbf{X}) \mathbf{1}_{F,F}, \\ L_3^{k_1,k_2}(\mathbf{X}, \mathbf{Y}) &= \lambda_3^{k_1,k_2} \mathbf{1}_{N,N} (\mathbf{X} - \mathbf{X} \mathbf{1}_{F,F}), & L_4^{k_1,k_2}(\mathbf{X}, \mathbf{Y}) &= \lambda_4^{k_1,k_2} (\mathbf{X} - \mathbf{1}_{N,N} \mathbf{X} \mathbf{1}_{F,F}), \\ L_5^{k_1,k_2}(\mathbf{X}, \mathbf{Y}) &= \lambda_5^{k_1,k_2} \mathbf{1}_{N,N} \mathbf{X} \mathbf{1}_{F,C}, & L_6^{k_1,k_2}(\mathbf{X}, \mathbf{Y}) &= \lambda_6^{k_1,k_2} (\mathbf{Y} - \mathbf{1}_{N,N} \mathbf{X}) \mathbf{1}_{F,C}, \\ L_7^{k_1,k_2}(\mathbf{X}, \mathbf{Y}) &= \lambda_7^{k_1,k_2} \mathbf{1}_{N,N} \mathbf{Y} \mathbf{1}_{C,C}, & L_8^{k_1,k_2}(\mathbf{X}, \mathbf{Y}) &= \lambda_8^{k_1,k_2} (\mathbf{Y} - \mathbf{1}_{N,N} \mathbf{Y}) \mathbf{1}_{C,C}, \\ L_9^{k_1,k_2}(\mathbf{X}, \mathbf{Y}) &= \lambda_9^{k_1,k_2} \mathbf{1}_{N,N} (\mathbf{Y} - \mathbf{Y} \mathbf{1}_{C,C}), & L_{10}^{k_1,k_2}(\mathbf{X}, \mathbf{Y}) &= \lambda_{10}^{k_1,k_2} (\mathbf{Y} - \mathbf{1}_{N,N} \mathbf{Y} \mathbf{1}_{C,C}), \\ L_{11}^{k_1,k_2}(\mathbf{X}, \mathbf{Y}) &= \lambda_{11}^{k_1,k_2} \mathbf{1}_{N,N} \mathbf{Y} \mathbf{1}_{C,F}, & L_{12}^{k_1,k_2}(\mathbf{X}, \mathbf{Y}) &= \lambda_{12}^{k_1,k_2} (\mathbf{Y} - \mathbf{1}_{N,N} \mathbf{Y}) \mathbf{1}_{C,F}, \end{aligned}$$

857 Thus, the general form can be written as:

$$\begin{aligned} \forall i \in [6], \quad \mathbf{X}_{k_2}^{(i)} &= \sum_{k_1=0}^{K_1} \lambda_{k_2,k_1}^{(i)} \mathbf{X}_{k_1}, \quad \mathbf{Y}_{k_2}^{(i)} = \sum_{k_1=0}^{K_1} \lambda_{k_2,k_1}^{(i+6)} \mathbf{Y}_{k_1} \\ T_1(\mathbf{X}, \mathbf{Y})_{k_2} &= \left( \mathbf{1}_{N,N} \mathbf{X}_{k_2}^{(1)} + \mathbf{X}_{k_2}^{(2)} \right) \mathbf{1}_{F,F} + \mathbf{1}_{N,N} \mathbf{X}_{k_2}^{(3)} + \mathbf{X}_{k_2}^{(4)} + \left( \mathbf{1}_{N,N} \mathbf{Y}_{k_2}^{(5)} + \mathbf{X}_{k_2}^{(6)} \right) \mathbf{1}_{C,F}, \\ T_2(\mathbf{X}, \mathbf{Y})_{k_2} &= \left( \mathbf{1}_{N,N} \mathbf{Y}_{k_2}^{(1)} + \mathbf{Y}_{k_2}^{(2)} \right) \mathbf{1}_{C,C} + \mathbf{1}_{N,N} \mathbf{Y}_{k_2}^{(3)} + \mathbf{Y}_{k_2}^{(4)} + \left( \mathbf{1}_{N,N} \mathbf{X}_{k_2}^{(5)} + \mathbf{X}_{k_2}^{(6)} \right) \mathbf{1}_{F,C}, \end{aligned}$$

858 where  $T = (T_1, T_2)$  are  $(S_N \times S_F \times S_C)$ -equivariant linear function of the form

$$T = (T_1, T_2): \mathbb{R}^{K_1 \times N \times F} \times \mathbb{R}^{K_1 \times N \times C} \rightarrow \mathbb{R}^{K_2 \times N \times F} \times \mathbb{R}^{K_2 \times N \times C}.$$

859

□

## 860 B Proof of Theorem 4.2

### 861 B.1 Background and Definitions

862 Contrarily to the notations defined in Section 2, we denote  $\mathbf{1}_N$  as the vector of  $N$  ones.

863 **Polynomials.** Let  $\mathbf{X} \in \mathbb{R}^{N \times (F+C)}$ . We denote the first  $F$  columns by  $\mathbf{X}^{(F)} \in \mathbb{R}^{N \times F}$  and the last  
864  $C$  columns by  $\mathbf{X}^{(C)} \in \mathbb{R}^{N \times C}$ , such that  $\mathbf{X} = (\mathbf{X}^{(F)}, \mathbf{X}^{(C)})$ . We also denote that all permutation  
865 subgroup act on vectors by permuting their indices.

866 Let  $\mathbf{x} \in \mathbb{R}^D$  be a vector. For a multi-index  $\alpha \in \mathbb{N}^D$ , define the monomial  $\mathbf{x}^\alpha = x_1^{\alpha_1} \cdots x_D^{\alpha_D}$  and its  
867 total degree  $\|\alpha\|_1$ . Let  $\{\alpha^{(1)}, \dots, \alpha^{(T)}\}$  enumerate all such multi-indices  $\alpha \in \mathbb{N}_0^D$  with  $\|\alpha\|_1 \leq N$ ,  
868 where  $T = \binom{N+D}{D}$ .

869 Let  $\mathbf{X} \in \mathbb{R}^{N \times D}$  and let  $p : \mathbb{R}^{N \times D} \rightarrow \mathbb{R}^{L \times K}$ . For any  $l \in [L]$ , we define  $p_l : \mathbb{R}^{N \times D} \rightarrow \mathbb{R}^K$  to be  
870 the mapping that extracts the  $l$ -th row of  $p(\mathbf{X})$ . Explicitly,

$$p_l(\mathbf{X}) = (p(\mathbf{X})_{l,1}, p(\mathbf{X})_{l,2}, \dots, p(\mathbf{X})_{l,K}) \in \mathbb{R}^K,$$

871 that is, the  $K$ -dimensional feature vector corresponding to the  $l$ -th row of  $p(\mathbf{X})$ . Similarly, for all  
872  $l \in [L], k \in [K]$  we define  $p_{l,k} : \mathbb{R}^{N \times D} \rightarrow \mathbb{R}$  to be the mapping that extracts the  $(l, k)$ -th element of  
873  $p(\mathbf{X})$ .

874 **Groups.** We define an action of  $S_{N-1} \times S_{F-1} \times S_C$  on  $\mathbb{R}^{N \times (F+C)}$  by restricting the permutation  
875  $\sigma_{F-1} \in S_{F-1}$  to act only on the second to the  $F$ -th columns, and restricting the permutation  
876  $\sigma_{N-1} \in S_{N-1}$  to act only on last  $(N-1)$ -th rows, keeping element  $(1, 1)$  fixed. Formally,

$$((\sigma_{N-1}, \sigma_{F-1}, \sigma_C) \cdot \mathbf{X})_{n,j} = \begin{cases} \mathbf{X}_{1,1} & \text{if } n = 1 \text{ and } j = 1, \\ \mathbf{X}_{1,1+\sigma_{F-1}^{-1}(j-1)} & \text{if } n = 1 \text{ and } j \in [F] \setminus [1], \\ \mathbf{X}_{1,F+\sigma_C^{-1}(j-F)} & \text{if } n = 1 \text{ and } j \in [F+C] \setminus [F], \\ \mathbf{X}_{1+\sigma_{N-1}^{-1}(n-1),1} & \text{if } n \in [N] \setminus [1] \text{ and } j = 1, \\ \mathbf{X}_{1+\sigma_{N-1}^{-1}(n-1),1+\sigma_{F-1}^{-1}(j-1)} & \text{if } n \in [N] \setminus [1] \text{ and } j \in [F] \setminus [1], \\ \mathbf{X}_{1+\sigma_{N-1}^{-1}(n-1),F+\sigma_C^{-1}(j-F)} & \text{otherwise,} \end{cases}$$

877 for all  $(\sigma_{N-1}, \sigma_{F-1}, \sigma_C) \in S_{N-1} \times S_{F-1} \times S_C$  and  $\mathbf{X} \in \mathbb{R}^{N \times (F+C)}$ . In words,  $\sigma_{F-1}$  permutes  
878 the last  $F-1$  columns,  $\sigma_C$  acts as before on the last  $C$ , and  $\sigma_N$  acts on the last  $N-1$  rows, leaving  
879 element  $(1, 1)$  unchanged.

880 Similarly, the action of  $S_{N-1} \times S_F \times S_{C-1}$  on  $\mathbb{R}^{N \times (F+C)}$  is defined analogously: the permutation  
881  $\sigma_{C-1} \in S_{C-1}$  acts only on the last  $C-1$  label columns and the permutation  $\sigma_{N-1} \in S_{N-1}$  acts act  
882 only on last  $N-1$ -th rows, keeping element  $(1, F+1)$  fixed. That is,

$$((\sigma_{N-1}, \sigma_F, \sigma_{C-1}) \cdot \mathbf{X})_{n,j} =$$

883

$$= \begin{cases} \mathbf{X}_{1,F+1} & \text{if } n = 1 \text{ and } j = F+1, \\ \mathbf{X}_{1,F+1+\sigma_{C-1}^{-1}(j-F-1)} & \text{if } n = 1 \text{ and } j \in [F+C] \setminus [F+1], \\ \mathbf{X}_{1,\sigma_F^{-1}(j)} & \text{if } n = 1 \text{ and } j \in [F], \\ \mathbf{X}_{1+\sigma_{N-1}^{-1}(n-1),F+1} & \text{if } n \in [N] \setminus [1] \text{ and } j = F+1, \\ \mathbf{X}_{1+\sigma_{N-1}^{-1}(n-1),F+1+\sigma_{C-1}^{-1}(j-F-1)} & \text{if } n \in [N] \setminus [1] \text{ and } j \in [F+C] \setminus [F+1], \\ \mathbf{X}_{1+\sigma_{N-1}^{-1}(n-1),\sigma_F^{-1}(j)} & \text{otherwise,} \end{cases}$$

884 for all  $(\sigma_{N-1}, \sigma_F, \sigma_{C-1}) \in S_{N-1} \times S_F \times S_{C-1}$  and  $\mathbf{X} \in \mathbb{R}^{N \times (F+C)}$ .

### 885 B.2 Symmetric Polynomials

886 This subsection introduces key definitions and lemmas from symmetric polynomials and invariant  
887 theory that will be used in the proof of Theorem 4.2.

888 **Generating set of a polynomial ring.** Let  $\mathbb{R}[\mathbf{X}]$  denote the polynomial ring over  $\mathbb{R}^{N \times (F+C)}$ .  
 889 A finite set of polynomials  $\{p_1, \dots, p_L\} \subset \mathbb{R}[\mathbf{X}]$  is called a *generating set* for  $\mathbb{R}[\mathbf{X}]$  if every  
 890 polynomial in  $\mathbb{R}[\mathbf{X}]$  can be written as a polynomial in  $p_1, \dots, p_L$  (with real coefficients); that is,

$$\mathbb{R}[\mathbf{X}] = \mathbb{R}[p_1, \dots, p_L].$$

891 We define the power-sum multi-symmetric polynomials for us to use a known result from invariant  
 892 theory.

893 **Definition B.1** (Power-sum Multi-symmetric Polynomials (PMPs)). *Let  $M \in \mathbb{N}$ . The power-sum*  
 894 *multi-symmetric polynomials  $\{s_t\}_{t=1}^T : \mathbb{R}^{N \times D} \rightarrow \mathbb{R}$  are defined by*

$$s_t(\mathbf{X}) = \sum_{n=1}^N \mathbf{X}_{n,:}^{\alpha^{(t)}}$$

895 *and are parameterized by  $\alpha^{(t)} \in \mathbb{N}_0^D$  such that  $\|\alpha\|_1 \leq M$ , where  $T = \binom{M+D}{D}^2$ .*

896 This known result from invariant theory is utilized in the proof of Lemmas B.3 and B.6.

897 **Lemma B.2** (Corollary 8.4 in [Rydh, 2007]). *Let  $\mathbf{X} \in \mathbb{R}^{N \times D}$ . Let  $p : \mathbb{R}^{N \times D} \rightarrow \mathbb{R}$  be an*  
 898  *$S_N$ -invariant polynomial with degree  $M$ . Then, it can be written as a polynomial in the PMPs*

$$p(\mathbf{X}) = q(s_1(\mathbf{X}), \dots, s_T(\mathbf{X})),$$

899 *for some polynomial  $q : \mathbb{R}^T \rightarrow \mathbb{R}$ , where  $T = \binom{M+D}{D}$ .*

900 The following lemma enables the decomposition of polynomials that are not invariant under the  
 901 full symmetry group  $S_N$  into a combination of polynomials that are, thereby allowing them to be  
 902 approximated using our framework. The following lemma, originally stated as Lemma 2 in Segol and  
 903 Lipman [2019], contained a minor error in the summation index bounds. We present the corrected  
 904 version below.

905 **Lemma B.3** (Lemma 2 in Segol and Lipman [2019]). *Let  $p : \mathbb{R}^{N \times D} \rightarrow \mathbb{R}$  be an  $S_{N-1}$ -invariant*  
 906 *polynomial with degree  $M$ . Then*

$$p(\mathbf{X}) = \sum_{\|\alpha\|_1 \leq M} \mathbf{X}_{1,:}^{\alpha} q_{\alpha}(\mathbf{X}),$$

907 *where  $q_{\alpha} : \mathbb{R}^{N \times D} \rightarrow \mathbb{R}$  are  $S_N$ -invariant polynomials.*

### 908 B.3 Triple-symmetric Polynomials

909 We define the doubly power-sum multi-symmetric polynomials for us to prove a similar result to  
 910 Lemma B.2.

911 **Definition B.4** (Doubly power-sum Multi-symmetric Polynomials (DMPs)). *Let  $M \in \mathbb{N}$ . The doubly*  
 912 *power-sum multi-symmetric polynomials  $\{s_t^{(F)} : \mathbb{R}^{N \times (F+C)} \rightarrow \mathbb{R}\}_{t=1}^T \cup \{s_t^{(C)} : \mathbb{R}^{N \times (F+C)} \rightarrow$*   
 913  *$\mathbb{R}\}_{t=1}^T$  are defined by*

$$s_t^{(F)}(\mathbf{X}) = \sum_{f=1}^F \mathbf{X}_{:,f}^{\alpha^{(t)}}, \quad s_t^{(C)}(\mathbf{X}) = \sum_{c=1}^C \mathbf{X}_{:,F+c}^{\alpha^{(t)}}$$

914 *and are parameterized by  $\alpha^{(t)} \in \mathbb{N}_0^N$  such that  $\|\alpha\|_1 \leq M$ , where  $T = \binom{M+N}{N}$ .*

915 We now show that given  $\mathbf{X} \in \mathbb{R}^{N \times (F+C)}$ , the DMPs form a generating set for the ring of  $(S_F \times S_C)$ -  
 916 invariant polynomials. This is later employed in the construction of the approximating neural networks  
 917 in Theorem 4.2.

---

<sup>2</sup>We count the number of possible  $\alpha$  by introducing a slack variable  $\alpha_{D+1} := M - \sum_{i=1}^D \alpha_i$ , so that  $\sum_{i=1}^{D+1} \alpha_i = M$ . The number of such non-negative integer solutions is equivalent to distributing  $M$  indistinguishable balls into  $D + 1$  distinguishable bins, which yields  $\binom{M+D}{D}$  possibilities.

918 **Lemma B.5.** Let  $\mathbf{X} \in \mathbb{R}^{N \times (F+C)}$ . Let  $p : \mathbb{R}^{N \times (F+C)} \rightarrow \mathbb{R}$  be an  $S_F \times S_C$ -invariant polynomial  
 919 with degree  $M$ . Then, it can be written as a polynomial in the DMPs

$$p(\mathbf{X}) = q(s_1^{(F)}(\mathbf{X}), \dots, s_T^{(F)}(\mathbf{X}), s_1^{(C)}(\mathbf{X}), \dots, s_T^{(C)}(\mathbf{X})),$$

920 for some polynomial  $q : \mathbb{R}^{2T} \rightarrow \mathbb{R}$ , where  $T = \binom{M+N}{N}$ .

921 *Proof.* Denote the degree of  $p$  by  $M$ . For every  $\mathbf{X} \in \mathbb{R}^{N \times (F+C)}$ , we fix  $\mathbf{X}^{(C)}$  and consider  $p$  as a  
 922 function of  $\mathbf{X}^{(F)}$ , denoted by  $p^{\mathbf{X}^{(C)}} : \mathbb{R}^{N \times F} \rightarrow \mathbb{R}$ , such that

$$p(\mathbf{X}) = p^{\mathbf{X}^{(C)}}(\mathbf{X}^{(F)}) \quad (8)$$

923 The space of  $S_F$ -invariant polynomials over  $\mathbb{R}^{N \times F}$  of bounded degree is a finite dimensional linear  
 924 space and therefore has a basis  $\{b_l\}_{l=1}^L : \mathbb{R}^{N \times F} \rightarrow \mathbb{R}$  with degree at most  $M$ , such that

$$p^{\mathbf{X}^{(C)}}(\mathbf{X}^{(F)}) = \sum_{l=1}^L c_l(\mathbf{X}^{(C)}) b_l(\mathbf{X}^{(F)}), \quad (9)$$

925 where the coefficients  $\{c_l(\mathbf{X}^{(C)})\}_{l=1}^L \in \mathbb{R}$  depend on  $\mathbf{X}^{(C)}$ .

926 By Equations (8) and (9), For every  $\mathbf{X} \in \mathbb{R}^{N \times (F+C)}$ , we get

$$p(\mathbf{X}) = \sum_{l=1}^L c_l(\mathbf{X}^{(C)}) b_l(\mathbf{X}^{(F)}), \quad (10)$$

927 where the coefficients  $\{c_l\}_{l=1}^L : \mathbb{R}^{N \times C} \rightarrow \mathbb{R}$  are now polynomials with degree at most  $M$  that  
 928 depend on  $\mathbf{X}^{(C)}$ . Let  $\sigma_C \in S_C$ . Since  $p$  is  $S_C$ -invariant, we get

$$p(\mathbf{X}) = p(\sigma_C \cdot \mathbf{X}).$$

929 Namely,

$$\sum_{l=1}^L c_l(\mathbf{X}^{(C)}) b_l(\mathbf{X}^{(F)}) = \sum_{l=1}^L c_l(\sigma_C \cdot \mathbf{X}^{(C)}) b_l(\mathbf{X}^{(F)}).$$

930 Now, due to the fact that basis elements are linearly independent, we must have

$$\forall l \in [L], \quad c_l(\mathbf{X}^{(C)}) = c_l(\sigma_C \cdot \mathbf{X}^{(C)}).$$

931 Hence, each  $\{c_l\}_{l=1}^L$  is an  $S_C$ -invariant polynomial. As a result, by Lemma B.2, each  $\{c_l\}_{l=1}^L$  can be  
 932 written as a polynomial  $v_l : \mathbb{R}^T \rightarrow \mathbb{R}$  in the the PMPs  $\{s_i\}_{i=1}^T : \mathbb{R}^{N \times C} \rightarrow \mathbb{R}$ , i.e.

$$c_l(\mathbf{X}^{(C)}) = v_l(s_1(\mathbf{X}^{(C)}), \dots, s_T(\mathbf{X}^{(C)})) \quad (11)$$

933 where  $T = \binom{M+N}{N}$ .

934 Moreover, since  $b_l$  are invariant to  $S_F$  by construction, by Lemma B.2, each  $\{b_l\}_{l=1}^L$  can be written  
 935 as a polynomial  $u_l : \mathbb{R}^T \rightarrow \mathbb{R}$  in the the multi-symmetric power-sum polynomials (PMPs)  $\{s_i\}_{i=1}^T : \mathbb{R}^{N \times F} \rightarrow \mathbb{R}$ , i.e.

$$b_l(\mathbf{X}^{(F)}) = u_l(s_1(\mathbf{X}^{(F)}), \dots, s_T(\mathbf{X}^{(F)})). \quad (12)$$

937 By substituting Equations (11) and (12) into Equation (10), we deduce that  $p$  is a doubly power-sum  
 938 multi-symmetric polynomial.  $\square$

939 Similarly to Lemma B.3, the following lemma enables the decomposition of  $(S_{F-1} \times S_C)$ -invariant  
 940 polynomials into a combination of polynomials that are  $(S_F \times S_C)$ -invariant. This decomposi-  
 941 tion is later used to express general  $S_N \times S_F \times S_C$ -equivariant polynomials, which facilitates  
 942 an approximation of  $S_N \times S_F \times S_C$ -equivariant functions using  $S_F \times S_C$ -invariant functions in  
 943 Lemma B.16.

944 **Lemma B.6.** Let  $p : \mathbb{R}^{N \times (F+C)} \rightarrow \mathbb{R}$  be an  $(S_{F-1} \times S_C)$ -invariant polynomial with degree  $M$ .  
 945 Then, there exist  $S_F \times S_C$ -invariant polynomials  $\{q_\kappa : \mathbb{R}^{N \times (F+C)} \rightarrow \mathbb{R}\}_{\|\kappa\|_1 \leq M}$  such that

$$p(\mathbf{X}) = \sum_{\|\kappa\|_1 \leq M} \mathbf{X}_{:,1}^\kappa q_\kappa(\mathbf{X}).$$

946 *Proof.* One can expand the polynomial  $p(\mathbf{X})$  in  $\mathbf{X}_{:,1}$  as

$$p(\mathbf{X}) = \sum_{\|\gamma\|_1 \leq M} \mathbf{X}_{:,1}^\gamma p_\gamma(\mathbf{X}_{:,2}, \dots, \mathbf{X}_{:,F+C}), \quad (13)$$

947 where each  $p_\gamma : \mathbb{R}^{N \times (F-1+C)} \rightarrow \mathbb{R}$  is a polynomial of degree at most  $M - \|\gamma\|_1$ .

948 Since derivatives commute with the action of  $S_{F-1} \times S_C$ , any partial derivative of an  $(S_{F-1} \times$   
 949  $S_C)$ -invariant polynomial is also an invariant polynomial. Moreover, plugging  $\mathbf{X}_{:,1} = 0$  into an  
 950  $(S_{F-1} \times S_C)$ -invariant polynomial  $u : \mathbb{R}^{F \times C} \rightarrow \mathbb{R}$  gives an  $(S_{F-1} \times S_C)$ -invariant polynomial  
 951  $u|_{\mathbf{X}_{:,1}=0} : \mathbb{R}^{(F-1) \times C} \rightarrow \mathbb{R}$ . Hence, the polynomials

$$p_\gamma(\mathbf{X}_{:,2}, \dots, \mathbf{X}_{:,F+C}) = \left( \frac{\partial \|\gamma\|_1}{\partial \mathbf{X}_{:,1}} p \right) (0, \mathbf{X}_{:,2}, \dots, \mathbf{X}_{:,F+C}), \quad \forall \|\gamma\|_1 \leq M$$

952 are  $(S_{F-1} \times S_C)$ -invariant.

953 Following Definition B.4 with respect to the domain  $\mathbb{R}^{N \times ((F-1)+C)}$ , the doubly multi-symmetric  
 954 power-sum polynomials (DMPs)  $\mathbb{R}^{N \times ((F-1)+C)} \rightarrow \mathbb{R}$  map the variable  $\mathbf{Z} \in \mathbb{R}^{N \times ((F-1)+C)}$  to

$$\hat{s}_t^{(F)}(\mathbf{Z}) = \sum_{f=1}^{F-1} \mathbf{Z}_{:,f}^{\beta^{(t)}} \quad \text{and} \quad \hat{s}_t^{(C)}(\mathbf{Z}) = \sum_{c=1}^C \mathbf{Z}_{:,F-1+c}^{\beta^{(t)}},$$

955 where these polynomials are parameterized by  $t \in [T]$  for  $T = \binom{M+N}{N}$ , in order to go through all  
 956 multi-indices  $\beta^{(t)} \in \mathbb{N}_0^N$  such that  $\|\beta^{(t)}\|_1 \leq M$ .

957 Similarly, following Definition B.4 with respect to the domain  $\mathbb{R}^{N \times (F+C)}$ , the DMPs  $s_t^{(C)}, s_t^{(F)} :$   
 958  $\mathbb{R}^{N \times (F+C)} \rightarrow \mathbb{R}$  map the variable  $\mathbf{Y} \in \mathbb{R}^{N \times (F+C)}$  to

$$s_t^{(F)}(\mathbf{Y}) = \sum_{f=1}^F \mathbf{Y}_{:,f}^{\alpha^{(t)}} \quad \text{and} \quad s_t^{(C)}(\mathbf{Y}) = \sum_{c=1}^C \mathbf{Y}_{:,F+c}^{\alpha^{(t)}},$$

959 where these polynomials are parameterized by  $t \in [T]$ , in order to go through all multi-indices  
 960  $\alpha^{(t)} \in \mathbb{N}_0^N$  such that  $\|\alpha^{(t)}\|_1 \leq M$ .

961 Without loss of generality, assume that the ordering of  $\{\alpha^{(t)}\}_{t=1}^T$  matches that of  $\{\beta^{(t)}\}_{t=1}^T$  over the  
 962  $T$  multi-indices that were set by  $\{\beta^{(t)}\}_{t=1}^T$ , i.e.

$$\forall t \in [T], \quad \alpha^{(t)} = \beta^{(t)}.$$

963 Thus, for each  $t \in [T]$ , we have that

$$\hat{s}_t^{(F-1)}(\mathbf{X}_{:,2}, \dots, \mathbf{X}_{:,F+C}) = s_t^{(F)}(\mathbf{X}) - \mathbf{X}_{:,1}^{\beta^{(t)}} \quad \text{and} \quad \hat{s}_t^{(C)}(\mathbf{X}_{:,2}, \dots, \mathbf{X}_{:,F+C}) = s_t^{(C)}(\mathbf{X}). \quad (14)$$

964 Each  $p_\gamma$  of (Equation (13)) is  $(S_{F-1} \times S_C)$ -invariant. Hence, by Lemma B.5, it can be expressed as a  
 965 polynomial  $\hat{q}_\gamma : \mathbb{R}^{2T} \rightarrow \mathbb{R}$  in the DMPs  $\mathbb{R}^{N \times ((F-1)+C)} \rightarrow \mathbb{R}$  map the variable  $\mathbf{Z} \in \mathbb{R}^{N \times ((F-1)+C)}$ ,  
 966 i.e.,

$$p_\gamma(\mathbf{X}_{:,2}, \dots, \mathbf{X}_{:,F+C}) = \hat{q}_\gamma \left( \hat{s}_1^{(F-1)}(\mathbf{X}_{:,2}, \dots, \mathbf{X}_{:,F+C}), \dots, \hat{s}_T^{(F-1)}(\mathbf{X}_{:,2}, \dots, \mathbf{X}_{:,F+C}), \right. \\ \left. \hat{s}_1^{(C)}(\mathbf{X}_{:,2}, \dots, \mathbf{X}_{:,F+C}), \dots, \hat{s}_T^{(C)}(\mathbf{X}_{:,2}, \dots, \mathbf{X}_{:,F+C}) \right).$$

and by Equation (14) it can be written as

$$p_\gamma(\mathbf{X}_{:,2}, \dots, \mathbf{X}_{:,F+C}) = \hat{q}_\gamma \left( s_1^{(F)}(\mathbf{X}) - \mathbf{X}_{:,1}^{\beta^{(1)}}, \dots, s_T^{(F)}(\mathbf{X}) - \mathbf{X}_{:,1}^{\beta^{(T)}}, \right. \\ \left. s_1^{(C)}(\mathbf{X}^{(C)}), \dots, s_T^{(C)}(\mathbf{X}^{(C)}) \right). \quad (15)$$

We can now expand  $\hat{q}_\gamma$  in the right-hand-side of (15) in monomials of  $\mathbf{X}_{:,1}$ , and write

$$p_\gamma(\mathbf{X}_{:,2}, \dots, \mathbf{X}_{:,F+C}) = \sum_{\|\delta_\gamma\|_1 \leq M} \mathbf{X}_{:,1}^{\delta_\gamma} \tilde{q}_{\delta_\gamma} \left( s_1^{(F)}(\mathbf{X}), \dots, s_T^{(F)}(\mathbf{X}), \right. \\ \left. s_1^{(C)}(\mathbf{X}), \dots, s_T^{(C)}(\mathbf{X}) \right) \quad (16)$$

where  $\delta_\gamma$  depends on  $\gamma$  and  $\tilde{q}_{\delta_\gamma}$  is an  $S_F \times S_C$ -invariant polynomial as it is a polynomial in the  $S_F \times S_C$ -invariant DMPs (see Definition B.4).

When substituting Equation (16) into Equation (13), we obtain

$$p(\mathbf{X}) = \sum_{\|\gamma\|_1 \leq M} \sum_{\|\delta_\gamma\|_1 \leq M} \mathbf{X}_{:,1}^{\gamma + \delta_\gamma} \tilde{q}_{\delta_\gamma} \left( s_1^{(F)}(\mathbf{X}), \dots, s_T^{(F)}(\mathbf{X}), \right. \\ \left. s_1^{(C)}(\mathbf{X}), \dots, s_T^{(C)}(\mathbf{X}), \right) \quad (17)$$

and recall that by Equation (13), each  $p_\gamma$  is of degree at most  $M - \|\gamma\|_1$ . Thus, by Equation (16)  $\|\gamma\|_1 + \|\delta_\gamma\|_1 \leq M$ .

Define  $\kappa = \gamma + \delta_\gamma$  and  $q_\kappa(\mathbf{X})$  as a finite linear combination of the  $\tilde{q}_\delta$  from Equation (16), such that Equation (17) can be written as

$$p(\mathbf{X}) = \sum_{\|\kappa\|_1 \leq M} \mathbf{X}_{:,1}^\kappa q_\kappa(\mathbf{X}).$$

Note that as  $q_\kappa(\mathbf{X})$  is defined as a finite linear combination of the  $\tilde{q}_\delta$ , it is also  $S_F \times S_C$ -invariant, concluding the proof.  $\square$

By the exact same proof technique a similar lemma holds.

**Lemma B.7.** *Let  $p : \mathbb{R}^{N \times (F+C)} \rightarrow \mathbb{R}$  be an  $(S_F \times S_{C-1})$ -invariant polynomial with degree  $M$ . Then, there exist  $S_F \times S_C$ -invariant polynomials  $\{q_\kappa : \mathbb{R}^{N \times (F+C)} \rightarrow \mathbb{R}\}_{\|\kappa\|_1 \leq \max(F,C)}$  such that*

$$p(\mathbf{X}) = \sum_{\|\kappa\|_1 \leq M} \mathbf{X}_{:,F+1}^\kappa q_\kappa(\mathbf{X}).$$

## B.4 Supporting Lemmas

The following Lemma B.8 is close to Lemma 4 in Segol and Lipman [2019]. Lemma B.8 extends Lemma 4 in Segol and Lipman [2019] by showing that it holds for general invariant sets rather than the cube and any subgroup of the permutations as the symmetry group. In the proof of the lemma we use the same well-known proof technique of symmetrization to enforce equivariance. This lemma is later used in the proof of Lemma B.16 to reduce the problem to approximating polynomial functions.

**Lemma B.8.** *Let  $G \leq S_K$ . Let  $\mathcal{K} \subset \mathbb{R}^K$  be a compact domain such that  $\mathcal{K} = \cup_{g \in G} g\mathcal{K}$ . Then the space of  $G$ -equivariant polynomials  $p : \mathbb{R}^K \rightarrow \mathbb{R}^L$  is dense in the space of continuous  $G$ -equivariant functions  $f : \mathcal{K} \rightarrow \mathbb{R}^L$  in  $L_\infty$  over  $\mathcal{K}$ .*

*Proof.* Let  $\epsilon > 0$  be arbitrary, and let  $f : \mathcal{K} \rightarrow \mathbb{R}^L$  be a continuous  $G$ -equivariant function. For each output coordinate  $f_l : \mathcal{K} \rightarrow \mathbb{R}$ , the classical Stone–Weierstrass theorem guarantees the existence of a polynomial  $p_l : \mathbb{R}^K \rightarrow \mathbb{R}$  such that

$$|f_l(\mathbf{X}) - p_l(\mathbf{X})| \leq \epsilon \quad \text{for all } \mathbf{X} \in \mathcal{K}.$$

Define the polynomial  $p : \mathbb{R}^K \rightarrow \mathbb{R}^L$  by

$$p(\mathbf{X}) = (p_1(\mathbf{X}), \dots, p_L(\mathbf{X})) \in \mathbb{R}^L, \quad \forall \mathbf{X} \in \mathbb{R}^K$$



994 The polynomial  $p$  is not necessarily  $G$ -equivariant. We now define the symmetrization of  $p$ , denoted  
 995 by  $\tilde{p} : \mathbb{R}^K \rightarrow \mathbb{R}^L$ , by

$$\tilde{p}(\mathbf{X}) = \frac{1}{|G|} \sum_{g \in G} g \cdot p(g^{-1} \cdot \mathbf{X}).$$

996 Now, since  $f$  is  $G$ -equivariant, we have

$$\begin{aligned} \|f(\mathbf{X}) - \tilde{p}(\mathbf{X})\|_\infty &= \left\| \frac{1}{|G|} \sum_{g \in G} g \cdot (f(g^{-1} \cdot \mathbf{X}) - p(g^{-1} \cdot \mathbf{X})) \right\|_\infty \\ &\leq \frac{1}{|G|} \sum_{g \in G} \|f(g^{-1} \cdot \mathbf{X}) - p(g^{-1} \cdot \mathbf{X})\|_\infty, \end{aligned}$$

998 and by the construction of  $p$

$$\|f(\mathbf{X}) - \tilde{p}(\mathbf{X})\|_\infty = \left\| \frac{1}{|G|} \sum_{g \in G} g \cdot (f(g^{-1} \cdot \mathbf{X}) - p(g^{-1} \cdot \mathbf{X})) \right\|_\infty \leq \epsilon.$$

999 Thus,  $\tilde{p}$  is an  $G$ -equivariant polynomial map that uniformly approximates  $f$ , concluding the proof.  $\square$

1000 Given  $G$ , a subgroup of the permutation group, we define a  $G$ -descriptor as a polynomial function  
 1001 that maps two matrices to the same output if and only if they differ by an element of  $G$ . These  
 1002  $G$ -descriptors are later used to approximate invariant functions in Lemma B.16.

1003 **Definition B.9** ( $G$ -descriptor). *Let  $G \leq S_N$  and  $\mathcal{K} \subseteq \mathbb{R}^{N \times D}$ . We call a  $G$ -invariant polynomial*  
 1004 *function  $q : \mathcal{K} \rightarrow \mathbb{R}^L$ , a  $G$ -descriptor, if it satisfies:*

$$\forall \mathbf{X}, \mathbf{Y} \in \mathcal{K}, \quad q(\mathbf{X}) = q(\mathbf{Y}) \iff \exists g \in G : \mathbf{Y} = g \cdot \mathbf{X}.$$

1005 Next, we cite Lemma 3 in from Maron et al. [2020], which shows the existence of a descriptors given  
 1006 a subgroup of the permutation group. These  $G$ -descriptors are later used to approximate invariant  
 1007 functions in Lemma B.16.

1008 **Lemma B.10** (Lemma 3 in Maron et al. [2020]). *Let  $G \leq S_N$  be a subgroup. Then, there exists a*  
 1009  *$G$ -descriptor  $u : \mathbb{R}^{N \times D} \rightarrow \mathbb{R}^L$ .*

1010 We also mention a triviality from point set topology (for example, see Lemma 5 from Maron et al.  
 1011 [2020]).

1012 **Lemma B.11** (Lemma 5 in Maron et al. [2020]). *Let  $\mathcal{K} \subset \mathbb{R}^L$  be a compact domain and  $f : \mathcal{K} \rightarrow \mathbb{R}$*   
 1013 *be a continuous function such that  $f = h \circ g$ , where  $g$  is continuous. Then  $h$  is continuous on  $g(\mathcal{K})$ .*

## 1014 B.5 Supporting Universal Approximation Properties

1015 First, we mention a classical Universal Approximation Theorem (UAT) as it is later employed to  
 1016 show universality in Lemma B.16.

1017 **Theorem B.12** (Universal approximation theorem Pinkus [1999]). *Let  $\sigma : \mathbb{R} \rightarrow \mathbb{R}$  be a continuous,*  
 1018 *non-polynomial function. Then, for every  $M, L \in \mathbb{N}$ , compact  $\mathcal{K} \subseteq \mathbb{R}^M$ , continuous function*  
 1019  *$f : \mathcal{K} \rightarrow \mathbb{R}^L$ , and  $\varepsilon > 0$ , there exist  $D \in \mathbb{N}$ ,  $\mathbf{W}_1 \in \mathbb{R}^{D \times M}$ ,  $\mathbf{b}_1 \in \mathbb{R}^D$  and  $\mathbf{W}_2 \in \mathbb{R}^{L \times D}$  such that*

$$\sup_{\mathbf{x} \in \mathcal{K}} \|f(\mathbf{x}) - \mathbf{W}_2 \sigma(\mathbf{W}_1 \mathbf{x} + \mathbf{b}_1)\| \leq \varepsilon.$$

1020 We next study universality with respect to composition of functions. For that, we first define universal  
 1021 approximation rigorously.

1022 **Definition B.13.** *Let  $D_1, D_2 \in \mathbb{N}$ . A space of continuous functions  $\mathcal{N}$  from a domain  $Q_1 \subset \mathbb{R}^{D_1}$  to a*  
 1023 *domain  $Q_2 \subset \mathbb{R}^{D_2}$  is said to be a universal approximator of another space of continuous functions  $\mathcal{B}$*   
 1024 *from  $Q_1$  to  $Q_2$ , if  $\mathcal{N} \subset \mathcal{B}$ , and for every  $f \in \mathcal{B}$ , every compact domain  $C \subset \mathbb{R}^{D_1}$  such that  $C \subset Q_1$ ,*  
 1025 *and every  $\epsilon > 0$ , there is a function  $q \in \mathcal{N}$  such that for every  $x \in C$*

$$\|f(x) - q(x)\|_\infty < \epsilon.$$

1026 The following theorem is a trivial approximation theoretic result.

1027 **Theorem B.14.** *Let  $L \in \mathbb{N}$ , and  $D_1, \dots, D_{L+1} \in \mathbb{N}$ . Let  $\mathcal{N}_l$  be a universal approximator of  $\mathcal{B}_l$  for*  
 1028  *$l \in [L]$ . Let the domain of the functions  $\mathcal{B}_l$  be  $Q_l \subset \mathbb{R}^{D_l}$  and the range be  $Q_{l+1} \subset \mathbb{R}^{D_{l+1}}$ , for  $l \in [L]$ .*  
 1029 *Consider the function spaces*

$$\mathcal{N} := \{\theta_L \circ \dots \circ \theta_1 \mid \theta_l \in \mathcal{N}_l, l \in [L]\},$$

1030 *and*

$$\mathcal{B} := \{f_L \circ \dots \circ f_1 \mid f_l \in \mathcal{B}_l, l \in [L]\}.$$

1031 *Then  $\mathcal{N}$  is a universal approximator of  $\mathcal{B}$ .*

## 1032 B.6 The proof of Theorem 4.2

1033 We define a set called the exclusion set, that is used in Theorem 4.2 to enable the composition of  
 1034 descriptors under our triple symmetry.

1035 **Definition B.15** (The exclusion set). *The set*

$$\begin{aligned} \mathcal{E} = & \bigcup_{1 \leq f_1 < f_2 \leq F} \left\{ \mathbf{X} \in \mathbb{R}^{N \times (F+C)} \mid \sum_{n=1}^N \mathbf{X}_{n,f_1} = \sum_{n=1}^N \mathbf{X}_{n,f_2} \right\} \cup \\ & \bigcup_{1 \leq c_1 < c_2 \leq C} \left\{ \mathbf{X} \in \mathbb{R}^{N \times (F+C)} \mid \sum_{n=1}^N \mathbf{X}_{n,F+c_1} = \sum_{n=1}^N \mathbf{X}_{n,F+c_2} \right\} \cup \\ & \bigcup_{1 \leq n_1 < n_2 \leq N} \left\{ \mathbf{X} \in \mathbb{R}^{N \times (F+C)} \mid \sum_{j=1}^{F+C} \mathbf{X}_{n_1,j} = \sum_{j=1}^{F+C} \mathbf{X}_{n_2,j} \right\} \end{aligned}$$

1036 *is called the exclusion set corresponding to  $\mathbb{R}^{N \times (F+C)}$ .*

1037 The exclusion set  $\mathcal{E}$  is a finite union of linear subspaces of co-dimension one. We consider input  
 1038 matrices  $\mathbf{X} \in \mathbb{R}^{N \times (F+C)}$ , where  $\mathbf{X}^{(F)}$  correspond to continuous real-valued features and  $\mathbf{X}^{(C)}$   
 1039 encode one-hot vectors with entries in  $\{0, 1\}$ , assigning probability one to exactly one class and zero  
 1040 to the others in each row. The real-valued features  $\mathbf{X}^{(F)}$  vary continuously in  $\mathbb{R}^F$ . The set of features  
 1041 that lie inside the exclusion set  $\mathcal{E}$  is meagre with respect to the standard topology of the feature space  
 1042 (more specifically, it is nowhere dense). Hence, being outside  $\mathcal{E}$  is the generic case in the topological  
 1043 sense. From a probabilistic perspective, if the features are sampled from a joint distribution that is  
 1044 continuous with respect to the Lebesgue measure (in the Radon–Nikodym sense), then the features  
 1045 belong to  $\{\mathbf{X}^{(F)} \mid \mathbf{X} \in \mathcal{E}\}$  in probability zero. Hence, for the features to belong to  $\mathcal{E}$  is event that  
 1046 almost surely does not occur. With regard to the labels, the exclusion set  $\mathcal{E}$  rules out the special  
 1047 scenario in which multiple classes have exactly the same number of examples. If labels are samples  
 1048 from a reasonable joint probability space, where labels are not constrained to be balanced, such an  
 1049 even typically occurs in low probability. To summarize, from both the feature and label perspectives,  
 1050 the data typically lies outside the exclusion set  $\mathcal{E}$ , and hence considering a domain  $\mathcal{K}$  disjoint from  $\mathcal{E}$   
 1051 is reasonable. A similar philosophy regarding an exclusion set is adopted by Maron et al. [2020].

1052 **Note.** The following Lemma B.16 follows the same proof strategy as Theorem 3 of Maron et al.  
 1053 [2020] with added elements from Segol and Lipman [2019] to correct the issue detailed in Section 4.2  
 1054 and extend the Theorem for our triple-symmetry.

1055 We define  $\text{TSNet}^*$  as the class of architectures obtained by removing the final label projection layer  
 1056 from TSNet. Formally, a  $\text{TSNet}^*$  architecture is composed solely of interleaved  $(S_N \times S_F \times S_C)$ -  
 1057 equivariant linear layers (as defined in Equation (3)) and activation functions.

1058 To demonstrate that TSNet can approximate functions that are  $(S_N \times S_C)$ -equivariant and  $S_F$ -  
 1059 invariant to arbitrary accuracy, we prove that  $\text{TSNet}^*$  can approximate any  $(S_N \times S_F \times S_C)$ -  
 1060 equivariant function arbitrarily well. This result is then used in the proof of Theorem 4.2, before the  
 1061  $S_F$ -invariance is imposed by the final label projection layer.

1062 **Lemma B.16.** *Let  $\mathcal{K} \subset \mathbb{R}^{N \times (F+C)}$  be a compact domain such that  $\mathcal{K} = \bigcup_{g \in S_N \times S_F \times S_C} g\mathcal{K}$  and*  
 1063  *$\mathcal{K} \cap \mathcal{E} = \emptyset$ , where  $\mathcal{E} \subset \mathbb{R}^{N \times (F+C)}$  is the exclusion set corresponding to  $\mathbb{R}^{N \times (F+C)}$  (Definition B.15).*  
 1064 *Then,  $\text{TSNet}^*$  are universal approximators in  $L_\infty$  of continuous  $\mathcal{K} \rightarrow \mathbb{R}^{N \times (F+C)}$  functions that are*  
 1065  *$(S_N \times S_F \times S_C)$ -equivariant.*

1066 **Proof. Reduction to polynomials.** Let  $q : \mathcal{K} \rightarrow \mathbb{R}^{N \times (F+C)}$  be a continuous  $(S_N \times S_F \times S_C)$ -  
 1067 equivariant function, and let  $\epsilon > 0$ . By Lemma B.8, there exists an  $(S_N \times S_F \times S_C)$ -equivariant  
 1068 polynomial  $p : \mathbb{R}^{N \times (F+C)} \rightarrow \mathbb{R}^{N \times (F+C)}$  of some degree  $M$ , such that

$$\sup_{\mathbf{X} \in \mathcal{K}} \|p(\mathbf{X}) - q(\mathbf{X})\|_\infty < \frac{\epsilon}{2}. \quad (18)$$

1069 Until the rest of the proof, we show how to approximate the  $(S_N \times S_F \times S_C)$ -equivariant polynomial  
 1070  $p : \mathbb{R}^{N \times (F+C)} \rightarrow \mathbb{R}^{N \times (F+C)}$  by a TSNet\*.

1071 **Reduction to  $p_{1,1}$  and  $p_{1,F+1}$ .** Recall that we denote by  $p_{i,j}(\mathbf{X}) \in \mathbb{R}$  the  $(i,j)$ -th entry of  $p(\mathbf{X})$ .  
 1072 The polynomial  $p$  is  $(S_N \times S_F \times S_C)$ -equivariant, meaning that by definition

$$(\sigma_N, \sigma_F, \sigma_C) \cdot p(\mathbf{X}) = p((\sigma_N, \sigma_F, \sigma_C) \cdot \mathbf{X}),$$

1073 for all  $(\sigma_N, \sigma_F, \sigma_C) \in S_N \times S_F \times S_C$ . Applying,  $\sigma_N = (1n)$  and  $\sigma_F = (1f)$ , we obtain

$$p_{n,f}(\mathbf{X}) = p_{1,1}((\sigma_N, \sigma_F, e) \cdot \mathbf{X}), \quad \forall n \in [N], f \in [F], \quad (19)$$

1074 and by applying,  $\sigma_N = (1n)$  and  $\sigma_C = (1c)$ , we obtain

$$p_{n,F+c}(\mathbf{X}) = p_{1,1}((\sigma_N, e, \sigma_C) \cdot \mathbf{X}), \quad \forall n \in [N], c \in [C]. \quad (20)$$

1075 Thus, every entry in the output of  $p$  can be recovered from  $p_{1,1}$  or  $p_{1,F+1}$ , reducing the problem to  
 1076 the approximation of  $p_{1,1}$  and  $p_{1,F+1}$ , as we show next.

1077 **The symmetries of  $p_{1,1}$  and  $p_{1,F+1}$ .** The output element in the first row and column  $p_{1,1}$  can be  
 1078 viewed as the composition of  $p$  with the projection map  $\pi_{1,1} : \mathbb{R}^{N \times (F+C)} \rightarrow \mathbb{R}$ , defined by

$$\pi_{1,1}(\mathbf{X}) = \mathbf{X}_{1,1},$$

1079 which extracts the  $(1,1)$ -st element of  $\mathbf{X} \in \mathbb{R}^{N \times (F+C)}$ . Namely,  $p_{1,1} = \pi_{1,1} \circ p$ .

1080 The projection map  $\pi_{1,1}$  is invariant the action of  $S_{N-1} \times S_{F-1} \times S_C$ . This is because the permutations  
 1081 leave the  $(1,1)$ -st element unaffected while affecting all other elements. This symmetry is captured  
 1082 by the group  $S_{N-1} \times S_{F-1} \times S_C$ . Now, since  $p$  is an  $(S_N \times S_F \times S_C)$ -equivariant map, it is also  
 1083 an  $(S_{N-1} \times S_{F-1} \times S_C)$ -equivariant map. Thus,  $p_{1,1}$  is a composition of an  $(S_{N-1} \times S_{F-1} \times S_C)$ -  
 1084 equivariant map  $p$  and an  $(S_{N-1} \times S_{F-1} \times S_C)$ -invariant map  $\pi_{1,1}$ , making  $p_{1,1}$  an  $(S_{N-1} \times S_{F-1} \times S_C)$ -  
 1085 invariant function.

1086 By the same reasoning,  $p_{1,F+1}$  is an  $(S_{N-1} \times S_F \times S_{C-1})$ -invariant function.

1087 **A  $(S_{F-1} \times S_C)$ -descriptor  $Q^{(F)}$ .** By Lemma B.10, there exists an  $S_{F-1} \times S_C$ -descriptor (see  
 1088 Definition B.9)  $q^{(F)} : \mathbb{R}^{(F+C) \times 2} \rightarrow \mathbb{R}^{L_F}$  with degree  $M_F$ , namely, a polynomial such that

$$\forall \mathbf{Z}, \mathbf{Y} \in \mathbb{R}^{(F+C) \times 2} : \quad (21)$$

$$\left( q^{(F)}(\mathbf{Z}) = q^{(F)}(\mathbf{Y}) \right) \iff \left( \exists (\sigma_{F-1}, \sigma_C) \in S_{F-1} \times S_C : \mathbf{Z} = (\sigma_{F-1}, \sigma_C) \cdot \mathbf{Y} \right).$$

1089 We define a polynomial  $Q^{(F)} : \mathbb{R}^{N \times (F+C)} \setminus \mathcal{E} \rightarrow \mathbb{R}^{N \times L_F}$  as follows. Given  $\mathbf{X} \in \mathbb{R}^{N \times (F+C)} \setminus \mathcal{E}$ ,  
 1090 the polynomial is defined by taking the row vector  $\sum_{i=1}^N \mathbf{X}_{i,:} \in \mathbb{R}^{F+C}$  and appending it to each row  
 1091 of  $\mathbf{X}$  forming a new dimension and creating the intermediate tensor

$$\hat{\mathbf{X}} = [\mathbf{X}, \mathbf{1}_N \sum_{i=1}^N \mathbf{X}_{i,:}] \in \mathbb{R}^{N \times (F+C) \times 2}, \quad (22)$$

1092 To define  $Q^{(F)}$ , the function  $q^{(F)}$  is then applied on  $\hat{\mathbf{X}}$  via

$$\forall n \in [N], \quad Q^{(F)}(\mathbf{X})_{n,:} := q^{(F)}(\hat{\mathbf{X}}_{n,:,:}) = q^{(F)}([\mathbf{X}_{n,:}, \sum_{i=1}^N \mathbf{X}_{i,:}]). \quad (23)$$

1093 By construction, this makes  $Q^{(F)}$  an  $S_N$ -equivariant polynomial. Note that given a permutation  
 1094  $(\sigma_{F-1}, \sigma_C) \in S_{F-1} \times S_C$ , for every  $\mathbf{Z}, \mathbf{Y} \in \mathbb{R}^{N \times (F+C)}$ , we have

$$\begin{aligned} & \left( \forall n : \mathbf{Z}_{n,:} = (\sigma_{F-1}, \sigma_C) \cdot \mathbf{Y}_{n,:} \right) \\ & \iff \left( \forall n : \left[ \mathbf{Z}, \mathbf{1}_N \sum_{i=1}^N \mathbf{Z}_{i,:} \right]_{n,:} = \left[ (\sigma_{F-1}, \sigma_C) \cdot \mathbf{Y}, (\sigma_{F-1}, \sigma_C) \cdot \mathbf{1}_N \sum_{i=1}^N \mathbf{Y}_{i,:} \right]_{n,:} \right) \\ & \iff \left( \forall n : \hat{\mathbf{Z}}_{n,:} = (\sigma_{F-1}, \sigma_C) \cdot \hat{\mathbf{Y}}_{n,:} \right). \end{aligned}$$

Thus, we obtained that

$$\left( \forall n : \mathbf{Z}_{n,:} = (\sigma_{F-1}, \sigma_C) \cdot \mathbf{Y}_{n,:} \right) \iff \left( \forall n : \hat{\mathbf{Z}}_{n,:} = (\sigma_{F-1}, \sigma_C) \cdot \hat{\mathbf{Y}}_{n,:} \right). \quad (24)$$

We now prove that  $Q^{(F)}$  is an  $S_N$ -equivariant polynomial that satisfies

$$\begin{aligned} \forall \mathbf{Z}, \mathbf{Y} \in \mathbb{R}^{N \times (F+C)} \setminus \mathcal{E} : \\ Q^{(F)}(\mathbf{Z}) = Q^{(F)}(\mathbf{Y}) \iff \exists (\sigma_{F-1}, \sigma_C) \in S_{F-1} \times S_C : \mathbf{Y} = (\sigma_{F-1}, \sigma_C) \cdot \mathbf{Z}. \end{aligned} \quad (25)$$

**Direction  $\Leftarrow$  of Equation (25).** Assume there exists  $(\sigma_{F-1}, \sigma_C) \in S_{F-1} \times S_C$ , such that  $\mathbf{Y} = (\sigma_{F-1}, \sigma_C) \cdot \mathbf{Z} \in \mathbb{R}^{N \times (F+C)}$ . By definition, the action of  $(\sigma_{F-1}, \sigma_C)$  permutes the columns of  $\mathbf{Z}$  identically across all rows, namely,

$$\forall n \in [N] : \quad \mathbf{Y}_{n,:} = (\sigma_{F-1}, \sigma_C) \cdot \mathbf{Z}_{n,:}$$

and by Equation (24)

$$\forall n \in [N] : \quad \hat{\mathbf{Y}}_{n,:} = (\sigma_{F-1}, \sigma_C) \cdot \hat{\mathbf{Z}}_{n,:}. \quad (26)$$

By Equations (21) and (26), we obtain

$$\forall n \in [N] : \quad q^{(F)}(\hat{\mathbf{Z}}_{n,:}) = q^{(F)}(\hat{\mathbf{Y}}_{n,:}),$$

and by the definition of  $Q^{(F)}$  in Equation (23), we have that  $Q^{(F)}(\mathbf{Y}) = Q^{(F)}(\mathbf{Z})$ .

**Direction  $\Rightarrow$  of Equation (25).** We now show the opposite direction. Assume that  $Q^{(F)}(\mathbf{Y}) = Q^{(F)}(\mathbf{Z})$  for some  $\mathbf{Y}, \mathbf{Z} \in \mathbb{R}^{N \times (F+C)} \setminus \mathcal{E}$ . By the definition of  $Q^{(F)}$  in Equation (23), we have that

$$\forall n \in [N] : \quad q^{(F)}(\hat{\mathbf{Z}}_{n,:}) = q^{(F)}(\hat{\mathbf{Y}}_{n,:}),$$

and by Equation (21), the equality implies the existence of a permutation  $(\sigma_{F-1}^{(n)}, \sigma_C^{(n)}) \in S_{F-1} \times S_C$  for each  $n \in [N]$ , such that

$$\hat{\mathbf{Y}}_{n,:} = (\sigma_{F-1}^{(n)}, \sigma_C^{(n)}) \cdot \hat{\mathbf{Z}}_{n,:}. \quad (27)$$

Next, we would like to show that

$$\forall n_1, n_2 \in [N] : \quad (\sigma_{F-1}^{(n_1)}, \sigma_C^{(n_1)}) = (\sigma_{F-1}^{(n_2)}, \sigma_C^{(n_2)}).$$

For that, consider two indices  $n_1 \neq n_2 \in [N]$ . By Equation (27) and the definition of  $\hat{\mathbf{Z}}$  and  $\hat{\mathbf{Y}}$  (Equation (22)), we get

$$\mathbf{1}_N \sum_{i=1}^N \mathbf{Y}_{i,:} = (\sigma_{F-1}^{(n_1)}, \sigma_C^{(n_1)}) \cdot \mathbf{1}_N \sum_{i=1}^N \mathbf{Z}_{i,:} \quad \text{and} \quad \mathbf{1}_N \sum_{i=1}^N \mathbf{Y}_{i,:} = (\sigma_{F-1}^{(n_2)}, \sigma_C^{(n_2)}) \cdot \mathbf{1}_N \sum_{i=1}^N \mathbf{Z}_{i,:}, \quad (28)$$

Since  $\mathbf{1}_N \sum_{i=1}^N \mathbf{Z}_{i,:}$  has equal rows (and so does  $\mathbf{1}_N \sum_{i=1}^N \mathbf{Y}_{i,:}$ ) and  $S_{F-1} \times S_C$  permutes all columns simultaneously, Equation (28) can be written as

$$(\sigma_{F-1}^{(n_1)}, \sigma_C^{(n_1)}) \cdot \sum_{i=1}^N \mathbf{Z}_{i,:} = (\sigma_{F-1}^{(n_2)}, \sigma_C^{(n_2)}) \cdot \sum_{i=1}^N \mathbf{Z}_{i,:}. \quad (29)$$

Recall that  $\mathbf{Y}, \mathbf{Z} \in \mathbb{R}^{N \times (F+C)} \setminus \mathcal{E}$ . Hence the first  $F$  entries of  $\sum_{i=1}^N \mathbf{Y}_{i,:}$  and  $\sum_{i=1}^N \mathbf{Z}_{i,:}$ , each have  $F$  distinct elements. Moreover, the last  $C$  entries of  $\sum_{i=1}^N \mathbf{Y}_{i,:}$  and  $\sum_{i=1}^N \mathbf{Z}_{i,:}$ , each have  $C$  distinct elements. Therefore, the only way that Equation (29) holds is when  $\sigma_{F-1}^{(n_1)} = \sigma_{F-1}^{(n_2)}$  and  $\sigma_C^{(n_1)} = \sigma_C^{(n_2)}$ . Thus, all row-wise permutations coincide, i.e.

$$\exists (\sigma_{F-1}, \sigma_C) \in S_{F-1} \times S_C, \forall i \in [N] : \quad (\sigma_{F-1}^{(i)}, \sigma_C^{(i)}) = (\sigma_{F-1}, \sigma_C),$$

and consequently by Equations (24) and (27),

$$\forall i \in [N] : \quad \mathbf{Y}_{i,:} = (\sigma_{F-1}, \sigma_C) \cdot \mathbf{Z}_{i,:}.$$

Thus,  $Q^{(F)} : \mathbb{R}^{N \times (F+C)} \rightarrow \mathbb{R}^{N \times L_F}$  is an  $S_N$ -equivariant polynomial that satisfies Equation (25).

1118 **A**  $(S_{N-1} \times S_{F-1} \times S_C)$ -**descriptor**  $Q^{(NF)}$ . By Lemma B.10, there exists an  $S_{N-1}$ -invariant  
 1119 polynomial  $q^{(N)} : \mathbb{R}^{N \times 3} \rightarrow \mathbb{R}^{L_N}$  with degree  $M_N$ , such that

$$\forall \mathbf{Z}, \mathbf{Y} \in \mathbb{R}^{N \times 3} : \quad \left( q^{(N)}(\mathbf{Z}) = q^{(N)}(\mathbf{Y}) \right) \iff \left( \exists \sigma_{N-1} \in S_{N-1} : \mathbf{Z} = \sigma_{N-1} \cdot \mathbf{Y} \right). \quad (30)$$

1120 We define a polynomial  $Q^{(NF)} : \mathbb{R}^{N \times (F+C)} \setminus \mathcal{E} \rightarrow \mathbb{R}^{L_N \times L_F}$ , where  $L_F$  is the output dimension of  
 1121 the polynomial descriptor  $q^{(F)}$  given in Equation (21), as follows. Given an input  $\mathbf{X} \in \mathbb{R}^{N \times (F+C)} \setminus \mathcal{E}$ ,  
 1122 the output  $Q^{(NF)}(\mathbf{X})$  is defined via the following composition of computations.

- 1123 (i) Compute  $Q^{(F)}(\mathbf{X}) \in \mathbb{R}^{N \times L_F}$ , as defined in Equation (23).  
 1124 (ii) Consider the column vectors  $\sum_{f=1}^F \mathbf{X}_{:,f} \in \mathbb{R}^N$  and  $\sum_{c=1}^C \mathbf{X}_{:,F+c} \in \mathbb{R}^N$ . Append these  
 1125 vectors to  $Q^{(F)}(\mathbf{X})$  forming a new dimension. Namely, construct the intermediate tensor

$$\widetilde{\mathbf{X}} = [Q^{(F)}(\mathbf{X}), \sum_{f=1}^F \mathbf{X}_{:,f} \mathbf{1}_{L_F}^\top, \sum_{c=1}^C \mathbf{X}_{:,F+c} \mathbf{1}_{L_F}^\top] \in \mathbb{R}^{N \times L_F \times 3}, \quad (31)$$

- 1126 (iii) Apply the function  $q^{(N)}$  on  $\widetilde{\mathbf{X}}$  to define  $Q^{(NF)}(\mathbf{X})$  via

$$\begin{aligned} \forall l \in [L_F] : \quad Q^{(NF)}(\mathbf{X})_{:,l} &:= q^{(N)}(\widetilde{\mathbf{X}}_{:,l,:}) \\ &= q^{(N)}([Q^{(F)}(\mathbf{X})_{:,l}, \sum_{f=1}^F \mathbf{X}_{:,f}, \sum_{c=1}^C \mathbf{X}_{:,F+c}]). \end{aligned} \quad (32)$$

1127 By construction,  $Q^{(NF)}$  is a polynomial from  $\mathbb{R}^{N \times (F+C)} \setminus \mathcal{E}$  to  $\mathbb{R}^{L_N \times L_F}$ . We now prove that  $Q^{(NF)}$   
 1128 satisfies  $\forall \mathbf{Z}, \mathbf{Y} \in \mathbb{R}^{N \times (F+C)} \setminus \mathcal{E}$ :

$$\begin{aligned} Q^{(NF)}(\mathbf{Z}) &= Q^{(NF)}(\mathbf{Y}) \\ &\Updownarrow \\ \exists (\sigma_{N-1}, \sigma_{F-1}, \sigma_C) \in S_{N-1} \times S_{F-1} \times S_C : \quad \mathbf{Y} &= (\sigma_{N-1}, \sigma_{F-1}, \sigma_C) \cdot \mathbf{Z}. \end{aligned} \quad (33)$$

1131 **Direction  $\uparrow$  of Equation (33).** Let  $\mathbf{Y}, \mathbf{Z} \in \mathbb{R}^{N \times (F+C)} \setminus \mathcal{E}$ . Suppose there exists  
 1132  $(\sigma_{N-1}, \sigma_{F-1}, \sigma_C) \in S_{N-1} \times S_{F-1} \times S_C$  such that  $\mathbf{Y} = (\sigma_{N-1}, \sigma_{F-1}, \sigma_C) \cdot \mathbf{Z}$ . Recall that  
 1133  $Q^{(F)}$  is  $S_N$ -equivariant. This, together with Equation (25), gives

$$\forall l \in [L_F] : \quad Q^{(F)}(\mathbf{Y})_{:,l} = \sigma_{N-1} \cdot Q^{(F)}(\mathbf{Z})_{:,l}. \quad (34)$$

1134 Substituting Equation (34) into the definition of  $\widetilde{\mathbf{Y}}$  in Equation (31), we get

$$\widetilde{\mathbf{Y}} = [\sigma_{N-1} \cdot Q^{(F)}(\mathbf{Z}), \sum_{f=1}^F \mathbf{Y}_{:,f} \mathbf{1}_{L_F}^\top, \sum_{c=1}^C \mathbf{Y}_{:,F+c} \mathbf{1}_{L_F}^\top].$$

1135 Since  $\mathbf{Y} = (\sigma_{N-1}, \sigma_{F-1}, \sigma_C) \cdot \mathbf{Z}$ , we obtain, by the fact that summation is invariant to permutations,

$$\widetilde{\mathbf{Y}} = \sigma_{N-1} \cdot [Q^{(F)}(\mathbf{Z}), \sum_{f=1}^F \mathbf{Z}_{:,f} \mathbf{1}_{L_F}^\top, \sum_{c=1}^C \mathbf{Z}_{:,F+c} \mathbf{1}_{L_F}^\top] = \sigma_{N-1} \cdot \widetilde{\mathbf{Z}}.$$

1136 Hence, by Equation (30)

$$\forall l \in [L_F] : \quad q^{(N)}(\widetilde{\mathbf{Z}}_{:,l,:}) = q^{(N)}(\widetilde{\mathbf{Y}}_{:,l,:}),$$

1137 and by the definition of  $Q^{(NF)}$  in Equation (32), we have that  $Q^{(NF)}(\mathbf{Y}) = Q^{(NF)}(\mathbf{Z})$ .

1138 **Direction  $\Downarrow$  of Equation (33).** We now show the opposite direction. Let  $\mathbf{Y}, \mathbf{Z} \in \mathbb{R}^{N \times (F+C)} \setminus \mathcal{E}$   
 1139 and assume  $Q^{(NF)}(\mathbf{Z}) = Q^{(NF)}(\mathbf{Y})$ . By the definition of  $Q^{(F)}$  in Equation (32), we have that

$$\forall l \in [L_F] : \quad q^{(N)}(\widetilde{\mathbf{Z}}_{:,l,:}) = q^{(N)}(\widetilde{\mathbf{Y}}_{:,l,:}),$$

and by Equation (30), the equality implies the existence of a permutation  $\sigma_{N-1}^{(l)} \in S_{N-1}$  for each  $l \in [L_F]$ , such that

$$\tilde{\mathbf{Y}}_{:,l,:} = \sigma_{N-1}^{(l)} \cdot \tilde{\mathbf{Z}}_{:,l,:}. \quad (35)$$

Next, we would like to show that

$$\forall l_1, l_2 \in [L_F] : \quad \sigma_{N-1}^{(l_1)} = \sigma_{N-1}^{(l_2)}.$$

For that, consider two indices  $l_1 \neq l_2 \in [L_F]$ . By Equation (35) and the definition of  $\tilde{\mathbf{Z}}$  and  $\tilde{\mathbf{Y}}$  (Equation (31)), we get

$$\sum_{f=1}^F \mathbf{Y}_{:,f} \mathbf{1}_{L_F}^\top = \sigma_{N-1}^{(l_1)} \cdot \sum_{f=1}^F \mathbf{Z}_{:,f} \mathbf{1}_{L_F}^\top \quad \text{and} \quad \sum_{c=1}^C \mathbf{Y}_{:,F+c} \mathbf{1}_{L_F}^\top = \sigma_{N-1}^{(l_1)} \cdot \sum_{c=1}^C \mathbf{Z}_{:,F+c} \mathbf{1}_{L_F}^\top, \quad (36)$$

and similarly for  $\sigma_{N-1}^{(l_2)}$ .

Since  $\sum_{f=1}^F \mathbf{Z}_{:,f} \mathbf{1}_{L_F}^\top$  and  $\sum_{c=1}^C \mathbf{Z}_{:,F+c} \mathbf{1}_{L_F}^\top$  has equal columns (and so does  $\sum_{f=1}^F \mathbf{Z}_{:,f} \mathbf{1}_{L_F}^\top$  and  $\sum_{c=1}^C \mathbf{Z}_{:,F+c} \mathbf{1}_{L_F}^\top$ ) and  $S_{F-1} \times S_C$  permutes all rows simultaneously, Equation (36) can be written as

$$\sigma_{N-1}^{(l_1)} \cdot \sum_{f=1}^F \mathbf{Z}_{:,f} = \sigma_{N-1}^{(l_2)} \cdot \sum_{f=1}^F \mathbf{Z}_{:,f} \quad \text{and} \quad \sigma_{N-1}^{(l_1)} \cdot \sum_{c=1}^C \mathbf{Z}_{:,F+c} = \sigma_{N-1}^{(l_2)} \cdot \sum_{c=1}^C \mathbf{Z}_{:,F+c} \quad (37)$$

Recall that  $\mathbf{Y}, \mathbf{Z} \in \mathbb{R}^{N \times (F+C)} \setminus \mathcal{E}$ . Hence  $\sum_{f=1}^F \mathbf{Y}_{:,f}, \sum_{f=1}^F \mathbf{Z}_{:,f}, \sum_{c=1}^C \mathbf{Y}_{:,F+c}$  and  $\sum_{c=1}^C \mathbf{Z}_{:,F+c}$ , each have  $N$  distinct elements. Therefore the only way that Equation (37) holds is when all col-wise permutations coincide, i.e.,

$$\exists \sigma_{N-1} \in S_{N-1}, \forall l \in [L_F] : \quad \sigma_{N-1}^{(l)} = \sigma_{N-1}.$$

and by Equation (35)

$$\forall l \in [L_F] : \quad Q^{(F)}(\mathbf{Y})_{:,l} = \sigma_{N-1} \cdot Q^{(F)}(\mathbf{Z})_{:,l}.$$

Recall that  $Q^{(F)}$  is  $S_N$ -equivariant, meaning,

$$Q^{(F)}(\mathbf{Y}) = Q^{(F)}(\sigma_{N-1} \cdot \mathbf{Z}),$$

and by Equation (25)

$$\exists (\sigma_{F-1}, \sigma_C) \in S_{F-1} \times S_C : \quad \mathbf{Y} = (\sigma_{N-1}, \sigma_{F-1}, \sigma_C) \cdot \mathbf{Z}.$$

Thus,  $Q^{(NF)} : \mathbb{R}^{N \times (F+C)} \rightarrow \mathbb{R}^{L_N \times L_F}$  satisfies Equation (33). Note that we can also flatten it to be  $Q^{(NF)} : \mathbb{R}^{N \times (F+C)} \rightarrow \mathbb{R}^{L_N L_F}$ .

**Expressing  $q^{(F)}$  and  $q^{(N)}$  using DMPs.** Recall the property of  $q^{(F)} : \mathbb{R}^{(F+C) \times 2} \rightarrow \mathbb{R}^{L_F}$  with degree  $M_F$ , in Equation (21):

$$\forall \mathbf{Z}, \mathbf{Y} \in \mathbb{R}^{(F+C) \times 2} : \quad q^{(F)}(\mathbf{Z}) = q^{(F)}(\mathbf{Y}) \iff \exists (\sigma_{F-1}, \sigma_C) \in S_{F-1} \times S_C : \mathbf{Z} = (\sigma_{F-1}, \sigma_C) \cdot \mathbf{Y}.$$

Let us focus on the  $l$ -the output dimension  $q_l^{(F)} : \mathbb{R}^{(F+C) \times 2} \rightarrow \mathbb{R}$  and denote it by  $\hat{q}^{(F)}$  for brevity.

By Lemma B.6, the  $(S_{F-1} \times S_C)$ -invariant polynomial  $\hat{q}^{(F)} : \mathbb{R}^{(F+C) \times 2} \rightarrow \mathbb{R}$  can be expressed by

$$\hat{q}^{(F)}(\mathbf{V}) = \sum_{\|\boldsymbol{\beta}\|_1 \leq M_F} \mathbf{V}_{1,:}^{\boldsymbol{\beta}} w_{\boldsymbol{\beta}}(\mathbf{V}), \quad (38)$$

where  $w_{\boldsymbol{\beta}} : \mathbb{R}^{(F+C) \times 2} \rightarrow \mathbb{R}$  are  $(S_F \times S_C)$ -invariant polynomials with degree at most  $M_F$ .

The doubly multi-symmetric power-sum polynomials (DMPs)  $s_t^{(C)}, s_t^{(F)} : \mathbb{R}^{(F+C) \times 2} \rightarrow \mathbb{R}$ , as defined in Definition B.4 with  $N = 2$  transposed to the second axis, map the variable  $\mathbf{V} \in \mathbb{R}^{(F+C) \times 2}$  to

$$s_t^{(F)}(\mathbf{V}) = \sum_{f=1}^F \mathbf{V}_{:,f}^{\boldsymbol{\alpha}^{(t)}} \quad \text{and} \quad s_t^{(C)}(\mathbf{V}) = \sum_{c=1}^C \mathbf{V}_{:,F+c}^{\boldsymbol{\alpha}^{(t)}},$$

where these polynomials are enumerated/indexed by  $t \in [T]$  for  $T = \binom{M_F+2}{2}$ , in order to parameterize all multi-indices  $\alpha^{(t)} \in \mathbb{N}_0^2$  such that  $\|\alpha^{(t)}\|_1 \leq M_F$ .

Fix  $\beta \in \mathbb{R}^2$  and denote  $w_\beta$  by  $w$  for brevity. By Lemma B.5, the  $(S_F \times S_C)$ -invariant polynomial  $w$  can be expressed as a polynomial  $u : \mathbb{R}^{2T} \rightarrow \mathbb{R}$  in the doubly multi-symmetric power-sum polynomials (DMPs)  $\{s_t^{(F)}\}_{t=1}^T : \mathbb{R}^{(F+C) \times 2} \rightarrow \mathbb{R}$  and  $\{s_t^{(C)}\}_{t=1}^T : \mathbb{R}^{(F+C) \times 2} \rightarrow \mathbb{R}$  by

$$w(\mathbf{V}) = u\left(s_1^{(F)}(\mathbf{V}), \dots, s_T^{(F)}(\mathbf{V}), s_1^{(C)}(\mathbf{V}), \dots, s_T^{(C)}(\mathbf{V})\right). \quad (39)$$

We can write  $w$  as composition of the three maps

$$w = u \circ t \circ b, \quad (40)$$

where  $b : \mathbb{R}^{(F+C) \times 2} \rightarrow \mathbb{R}^{(F+C) \times T}$ ,  $t : \mathbb{R}^{(F+C) \times T} \rightarrow \mathbb{R}^{2T}$  and  $u : \mathbb{R}^{2T} \rightarrow \mathbb{R}$ .

Here, the map  $b : \mathbb{R}^{(F+C) \times 2} \rightarrow \mathbb{R}^{(F+C) \times T}$  calculates all monomials of the DMPs. It does so by applying the single function  $\hat{b} : \mathbb{R}^2 \rightarrow \mathbb{R}^T$  row-wise, which calculates all monomials of the DMPs per row, i.e.,

$$\forall j \in [F+C] : \quad b(\mathbf{V})_{j,:} = \hat{b}(\mathbf{V}_{j,:}) := \left(\mathbf{V}_{j,:}^{\alpha^{(1)}}, \dots, \mathbf{V}_{j,:}^{\alpha^{(T)}}\right) \quad (41)$$

The map  $t : \mathbb{R}^{(F+C) \times T} \rightarrow \mathbb{R}^{2T}$  performs the relevant sums over  $F$  and  $C$  to derive the DMPs, when applied to  $\mathbf{H} = b(\mathbf{X}) \in \mathbb{R}^{(F+C) \times T}$  like so

$$t(\mathbf{H}) = \left(\sum_{f=1}^F \mathbf{H}_{f,:}, \sum_{c=1}^C \mathbf{H}_{F+c,:}\right). \quad (42)$$

Lastly,  $u : \mathbb{R}^{2T} \rightarrow \mathbb{R}$  is defined by (39).

**Approximating  $Q^{(F)}$  using TSNet\*.** Note that  $\hat{b}$  belongs to the space  $\mathcal{B}_1$  of all polynomials from  $\mathbb{R}^2$  to  $\mathbb{R}^T$ . By the Universal Approximation Theorem (Theorem B.12), the space  $\mathcal{N}_1$  of multilayer perceptrons (MLPs) from  $\mathbb{R}^2$  to  $\mathbb{R}^T$  is a universal approximator of  $\mathcal{B}_1$ .

The polynomial  $b$  applies  $\hat{b}$  row-wise (see Equation (41)) and belongs to the space  $\mathcal{B}_2$  of all polynomials  $z : \mathbb{R}^{(F+C) \times 2} \rightarrow \mathbb{R}^{(F+C) \times T}$  of the form  $z(\mathbf{V}) = (y(\mathbf{V}_{1,:}), \dots, y(\mathbf{V}_{F+C,:}))^\top$  for arbitrary polynomials  $y \in \mathcal{B}_1$ . Consider such a polynomial  $z$  and corresponding  $y$ . For any  $\epsilon > 0$  and compact domain  $C \subset \mathbb{R}^{(F+C) \times 2}$ , the domain  $C$  is contained in a larger compact domain of the form  $C' \times \dots \times C'$  where  $C' \subset \mathbb{R}^2$  is compact. Hence, by Theorem B.12  $q : C' \rightarrow \mathbb{R}^T$  can be approximated in infinity norm by an MLP  $\theta \in \mathcal{N}_1$  up to error  $\epsilon$ . Hence, we also have that  $\eta(\mathbf{V}) := (\theta(\mathbf{V}_{1,:}), \dots, \theta(\mathbf{V}_{F+C,:}))^\top$  approximates  $z$  up to error  $\epsilon$  in infinity norm. Such an  $\eta$  belongs to the space  $\mathcal{N}_2$  of networks from  $\mathbb{R}^{(F+C) \times 2}$  to  $\mathbb{R}^{(F+C) \times T}$  of the form  $\hat{\eta}(\mathbf{V}) := (\hat{\theta}(\mathbf{V}_{1,:}), \dots, \hat{\theta}(\mathbf{V}_{F+C,:}))^\top$ , where  $\hat{\theta} \in \mathcal{N}_1$ . This shows that  $\mathcal{N}_2$  is a universal approximator of  $\mathcal{B}_2$ .

The transformation  $t$  belongs to the space  $\mathcal{B}_3$  of linear  $(S_F \times S_C)$ -equivariant functions from  $\mathbb{R}^{(F+C) \times T}$  to  $\mathbb{R}^{2T}$ . Specifically, it corresponds to the layers next to coefficient matrices  $\mathbf{A}_2, \mathbf{A}_6, \mathbf{A}_8, \mathbf{A}_{12}$  in Equation (3). Consider the space  $\mathcal{N}_3$  of linear MLPs consisting of the  $(S_F \times S_C)$ -equivariant linear layers from  $\mathbb{R}^{(F+C) \times T}$  to  $\mathbb{R}^{2T}$ . Specifically, the layers which correspond to the coefficient matrices  $\mathbf{A}_2, \mathbf{A}_6, \mathbf{A}_8, \mathbf{A}_{12}$  in Equation (3). By Proposition 4.1, any function from  $\mathcal{B}_3$  can be implemented as a function from  $\mathcal{N}_3$ , so  $\mathcal{N}_3$  is trivially a universal approximator of  $\mathcal{B}_3$ .

The polynomial  $u$  belongs to the space  $\mathcal{B}_4$  of all polynomials from  $\mathbb{R}^{2T}$  to  $\mathbb{R}$ . By the Universal Approximation Theorem (Theorem B.12) the space  $\mathcal{N}_4$  of multilayer perceptrons (MLPs) from  $\mathbb{R}^{2T}$  to  $\mathbb{R}$  is a universal approximator of  $\mathcal{B}_4$ .

Denote

$$\mathcal{N}_w := \{\theta_4 \circ \theta_3 \circ \theta_2 \mid \theta_2 \in \mathcal{N}_2, \theta_3 \in \mathcal{N}_3, \theta_4 \in \mathcal{N}_4\},$$

which contains the polynomial  $w_\beta$  (see Equation (40)). By Theorem B.14, the function space  $\mathcal{N}_w$  is a universal approximator for the class of

$$\mathcal{B}_w := \{f_4 \circ f_3 \circ f_2 \mid f_2 \in \mathcal{B}_2, f_3 \in \mathcal{B}_3, f_4 \in \mathcal{B}_4\}.$$

Next, we construct a space  $\mathcal{B}_F$  of polynomials from  $\mathbb{R}^{N \times (F+C)} \setminus \mathcal{E}$  to  $\mathbb{R}^{N \times L_F}$ , and show that  $Q^{(F)} \in \mathcal{B}_F$ . A general function from the space  $\mathcal{B}_F$  is defined constructively as follows. Given an

1204 input  $\mathbf{X} \in \mathbb{R}^{N \times (F+C)} \setminus \mathcal{E}$ , we first compute its row-wise sum  $\sum_{i=1}^N \mathbf{X}_{i,:}$  and append it to a new  
 1205 dimension of  $\mathbf{X}$ , creating a tensor  $\mathbf{V} \in \mathbb{R}^{N \times (F+C) \times 2}$  via

$$\forall n \in [N] : \quad \mathbf{V}_{n,:,:} = [\mathbf{X}_{n,:}, \sum_{i=1}^N \mathbf{X}_{i,:}].$$

1206 Next, for some  $Y \in \mathbb{N}$  (which can be any value from  $\mathbb{N}$ ), we define for each multi-index  $\beta$  with  
 1207  $\|\beta\|_1 < Y$ , a polynomial  $R_\beta \in \mathcal{B}_w$  ( $R_\beta$  can be any function from  $\mathcal{B}_w$ ). We then apply  $R_\beta$  row-wise  
 1208 on each  $\mathbf{V}_{n,:,:}$ , and multiply it by  $\mathbf{V}_{n,j,:}^\beta$ , to create the following array in  $\mathbb{R}^{N \times L_F}$

$$\left\{ \sum_{\|\beta\|_1 \leq Y} \mathbf{V}_{n,j,:}^\beta R_\beta(\mathbf{V}_{n,:,:}) \right\}_{i \in [N], j \in [F+C]}.$$

1209 Note that by Equations (22) and (23) and 38)–(42),  $Q^{(F)} \in \mathcal{B}_F$ .

1210 We now define a corresponding space of MLPs from  $\mathbb{R}^{N \times (F+C)} \setminus \mathcal{E}$  to  $\mathbb{R}^{N \times L_F}$ , that we denote by  
 1211  $\mathcal{N}_F$ , as follows. Given an input  $\mathbf{X} \in \mathbb{R}^{N \times (F+C)}$ , first compute its row-wise sum  $\sum_{i=1}^N \mathbf{X}_{i,:}$  and  
 1212 append it to a new dimension of  $\mathbf{X}$ , creating a tensor  $\mathbf{V} \in \mathbb{R}^{N \times (F+C) \times 2}$  like so

$$\forall n \in [N] : \quad \mathbf{V}_{n,:,:} = [\mathbf{X}_{n,:}, \sum_{i=1}^N \mathbf{X}_{i,:}].$$

1213 This operation can be implemented using the general form of  $(S_N \times S_F \times S_C)$ -equivariant  
 1214 linear maps. Specifically, it corresponds to a choice of coefficient matrices  $\mathbf{\Lambda}_3, \mathbf{\Lambda}_4, \mathbf{\Lambda}_9, \mathbf{\Lambda}_{10}$  in  
 1215 Equation (3). Next, we apply on  $\mathbf{V}_{n,j,:}$ , for each  $n \in [N]$  and  $j \in [F+C]$ , any sequence of general  
 1216 MLPs  $\theta_l : \mathbb{R}^2 \rightarrow \mathbb{R}$ ,  $l \in [L]$  for some  $L \in \mathbb{N}$ . Then, apply the same general MLP  $\zeta \in \mathcal{N}_w$  on  $\mathbf{V}_{n,:,:}$   
 1217 for all  $n \in [N]$ . Then apply any general MLP  $\kappa : \mathbb{R}^2 \rightarrow \mathbb{R}$  on each  $(\theta_l(\mathbf{V}_{n,l,:}), \zeta(\mathbf{V}_{n,:,:}))$ , and sum,  
 1218 to obtain

$$\left\{ \sum_{l=1}^L \kappa(\theta_l(\mathbf{V}_{n,j,:}), \zeta(\mathbf{V}_{n,:,:})) \right\}_{j \in [F+C]}.$$

1219 Since we can approximate the products of two numbers by an MLP  $\kappa : \mathbb{R}^2 \rightarrow \mathbb{R}$ , since we can  
 1220 approximate monomials  $\mathbf{V}_{n,j,:}^\beta$  by MLPs  $\theta_l : \mathbb{R}^2 \rightarrow \mathbb{R}$ , and since we can approximate polynomials  
 1221 from  $\mathcal{B}_w$  by MLPs from  $\mathcal{N}_w$ , the above space  $\mathcal{N}_F$  is a universal approximator of  $\mathcal{B}_F$ . Moreover, by  
 1222 construction, the space  $\mathcal{N}_F$  consists only of TSNet\*.

1223 **Approximating  $Q^{(NF)}$  using TSNet\*.** Similarly to the function space  $\mathcal{B}_w$  of  $(S_F \times S_C)$ -invariant  
 1224 polynomials. We can construct a the function space  $\hat{\mathcal{B}}_w$  of  $S_N$ -invariant polynomials from  $\mathbb{R}^{N \times 3}$  to  
 1225  $\mathbb{R}$ . By the same reasoning, similarly to the function space  $\mathcal{N}_w$  of  $(S_F \times S_C)$ -invariant MLPs, we can  
 1226 also construct a the function space  $\hat{\mathcal{N}}_w$  of  $S_N$ -invariant MLPs from  $\mathbb{R}^{N \times 3}$  to  $\mathbb{R}$ .

1227 Next, we construct a space  $\mathcal{B}_N$  of polynomials from  $\mathbb{R}^{N \times (F+C)} \setminus \mathcal{E}$  to  $\mathbb{R}^{L_N \times L_F}$ , and show that  
 1228  $Q^{(NF)} \in \mathcal{B}_N$ . A general function from the space  $\mathcal{B}_N$  is defined constructively as follows. Given an  
 1229 input  $\mathbf{X} \in \mathbb{R}^{N \times (F+C)} \setminus \mathcal{E}$ , we first compute  $T(\mathbf{X})$ , where  $T$  can be any function from  $\mathcal{B}_F$ . We also  
 1230 compute its column-wise sums  $\sum_{f=1}^F \mathbf{X}_{:,f}$  and  $\sum_{c=1}^C \mathbf{X}_{:,F+c}$  and concatenate the sums to the result  
 1231 of  $T(\mathbf{X})$  over a new tensors to create a tensor  $\mathbf{Z} \in \mathbb{R}^{N \times L_F \times 3}$  via

$$\forall j \in [F+C] : \quad \mathbf{Z}_{:,j,:} = [T(\mathbf{X})_{:,j}, \sum_{f=1}^F \mathbf{X}_{:,f}, \sum_{c=1}^C \mathbf{X}_{:,F+c}].$$

1232 Next, for some  $Y \in \mathbb{N}$  (which can be any value from  $\mathbb{N}$ ), we define for each multi-index  $\beta$  with  
 1233  $\|\beta\|_1 < Y$ , a polynomial  $\hat{R}_\beta \in \hat{\mathcal{B}}_w$  ( $\hat{R}_\beta$  can be any function from  $\hat{\mathcal{B}}_w$ ). We then apply  $\hat{R}_\beta$   
 1234 column-wise on each  $\mathbf{Z}_{:,j,:}$ , and multiply it by  $\mathbf{V}_{n,j,:}^\beta$ , to create the following array in  $\mathbb{R}^{L_N \times L_F}$

$$\left\{ \sum_{\|\beta\|_1 \leq Y} \mathbf{Z}_{n,j,:}^\beta \hat{R}_\beta(\mathbf{Z}_{:,j,:}) \right\}_{n \in [N], j \in [L_F]}.$$

1235 Note that by Equations (31) and (32),  $Q^{(NF)} \in \mathcal{B}_N$ .



1236 We now define a corresponding space of MLPs from  $\mathbb{R}^{N \times (F+C)} \setminus \mathcal{E}$  to  $\mathbb{R}^{L_N \times L_F}$ , that we denote by  
 1237  $\mathcal{N}_N$ , as follows. Given an input  $\mathbf{X} \in \mathbb{R}^{N \times (F+C)}$ , first compute  $\hat{T}(\mathbf{X})$ , where  $T$  can be any function  
 1238 from  $\mathcal{N}_F$ . We also compute its column-wise sums  $\sum_{f=1}^F \mathbf{X}_{:,f}$  and  $\sum_{c=1}^C \mathbf{X}_{:,F+c}$  and concatenate  
 1239 the sums to the result of  $\hat{T}(\mathbf{X})$  over a new tensors to create a tensor  $\mathbf{Z} \in \mathbb{R}^{N \times L_F \times 3}$  like so

$$\forall j \in [F+C] : \quad \mathbf{Z}_{:,j,:} = [T(\mathbf{X})_{:,j}, \sum_{f=1}^F \mathbf{X}_{:,f}, \sum_{c=1}^C \mathbf{X}_{:,F+c}].$$

1240 This operation can be implemented using the general form of  $(S_N \times S_F \times S_C)$ -equivariant  
 1241 linear maps. Specifically, it corresponds to a choice of coefficient matrices  $\mathbf{\Lambda}_2, \mathbf{\Lambda}_4, \mathbf{\Lambda}_6, \mathbf{\Lambda}_8, \mathbf{\Lambda}_{10}, \mathbf{\Lambda}_{12}$   
 1242 in Equation (3). Next, we apply on  $\mathbf{Z}_{n,j,:}$ , for each  $n \in [N]$  and  $j \in [L_F]$ , any sequence of general  
 1243 MLPs  $\hat{\theta}_l : \mathbb{R}^3 \rightarrow \mathbb{R}$ ,  $l \in [L]$  for some  $L \in \mathbb{N}$ . Then, apply the same general MLP  $\hat{\zeta} \in \hat{\mathcal{N}}_w$  on  $\mathbf{Z}_{:,j,:}$   
 1244 for all  $j \in [L_F]$ . Then apply any general MLP  $\hat{\kappa} : \mathbb{R}^2 \rightarrow \mathbb{R}$  on each  $(\hat{\theta}_l(\mathbf{V}_{n,j,:}), \hat{\zeta}(\mathbf{V}_{:,j,:}))$ , and sum,  
 1245 to obtain

$$\left\{ \sum_{l=1}^L \hat{\kappa}(\hat{\theta}_l(\mathbf{Z}_{n,j,:}), \hat{\zeta}(\mathbf{Z}_{:,j,:})) \right\}_{n \in [N], j \in [L_F]}.$$

1246 Since we can approximate the products of two numbers by an MLP  $\hat{\kappa} : \mathbb{R}^2 \rightarrow \mathbb{R}$ , since we can  
 1247 approximate monomials  $\mathbf{Z}_{n,j,:}^\beta$  by MLPs  $\hat{\theta}_l : \mathbb{R}^3 \rightarrow \mathbb{R}$ , and since we can approximate polynomials  
 1248 from  $\hat{\mathcal{B}}_w$  by MLPs from  $\hat{\mathcal{N}}_w$ , the above space  $\mathcal{N}_N$  is a universal approximator of  $\mathcal{B}_N$ . Moreover, by  
 1249 construction, the space  $\mathcal{N}_N$  consists only of TSNet<sup>\*</sup>.

1250 **Approximating  $p_{1,1}$  using our architecture.** Let  $\mathbf{Y}, \mathbf{Z} \in \mathbb{R}^{N \times (F+C)}$ . Define the equivalence  
 1251 relation  $\mathbf{Y} \sim_{NF} \mathbf{Z}$  if there exists  $(\sigma_{N-1}, \sigma_{F-1}, \sigma_C) \in S_{N-1} \times S_{F-1} \times S_C$  such that  $\mathbf{Y} =$   
 1252  $(\sigma_{N-1}, \sigma_{F-1}, \sigma_C) \cdot \mathbf{Z}$ . The quotient space  $\mathbb{R}^{N \times (F+C)} / (S_{N-1} \times S_{F-1} \times S_C)$  is the set of equivalence  
 1253 classes under this relation, equipped with the quotient topology, i.e., the finest topology that makes  
 1254 the canonical projection

$$\tilde{\pi} : \mathbb{R}^{N \times (F+C)} \rightarrow \mathbb{R}^{N \times D} / (S_{N-1} \times S_{F-1} \times S_C), \quad \tilde{\pi}(\mathbf{Y}) = [\mathbf{Y}]_{NF}$$

1255 continuous, where  $[\mathbf{Y}]_{NF}$  denotes the equivalence class of  $\mathbf{Y}$ .

1256 Let  $Q : \mathcal{K} \rightarrow \mathbb{R}^{L_F L_N}$  be the invariant map defined earlier, and for brevity write  $Q = Q^{(NF)}$ . Since  
 1257 both  $Q$  and  $p_{1,1} \mathcal{K} \rightarrow \mathbb{R}$  are  $(S_{N-1} \times S_{F-1} \times S_C)$ -invariant, they factor uniquely through the quotient  
 1258 space. That is, there exist unique continuous maps

$$\widetilde{p_{1,1}} : \tilde{\pi}(\mathcal{K}) \rightarrow p_{1,1}(\mathcal{K}) \quad \text{and} \quad \tilde{Q} : \tilde{\pi}(\mathcal{K}) \rightarrow Q(\mathcal{K}),$$

1259 such that

$$p_{1,1} = \widetilde{p_{1,1}} \circ \tilde{\pi} \quad \text{and} \quad Q = \tilde{Q} \circ \tilde{\pi}.$$

1260 Since the canonical projection  $\tilde{\pi}$  is continuous by definition, and  $p_{1,1}$  is continuous, by Lemma B.11  
 1261  $\widetilde{p_{1,1}}$  must also be continuous. Now as  $\mathcal{K}$  is compact,  $\tilde{\pi}(\mathcal{K})$  is also compact. Moreover,  $\tilde{Q}$  is a bijection  
 1262 on its domain and co-domain by Equation (33). Thus, we can now write  $p_{1,1}$  as

$$p_{1,1} = (\widetilde{p_{1,1}} \circ \tilde{Q}^{-1}) \circ \tilde{Q} \circ \tilde{\pi} = (\widetilde{p_{1,1}} \circ \tilde{Q}^{-1}) \circ Q.$$

1263 Denote  $\widetilde{p_{1,1}} \circ \tilde{Q}^{-1}$  by  $r : Q(\mathcal{K}) \rightarrow p_{1,1}(\mathcal{K})$ . Since  $\mathcal{K}$  is compact, both  $Q(\mathcal{K})$  and  $p_{1,1}(\mathcal{K})$  are compact  
 1264 as well. By Lemma B.11, the function  $r$  is continuous.

1265 Note that  $r$  belongs to the space  $\mathcal{B}_r$  of all polynomials from  $Q(\mathcal{K})$  to  $p_{1,1}(\mathcal{K})$ . By the Universal  
 1266 Approximation Theorem (Theorem B.12), the space  $\mathcal{N}_r$  of multilayer perceptrons (MLPs) from  $Q(\mathcal{K})$   
 1267 to  $p_{1,1}(\mathcal{K})$  is a universal approximator of  $\mathcal{B}_r$ .

1268 Denote

$$\mathcal{N} := \{\theta_r \circ \theta_N \mid \theta_N \in \mathcal{N}_N, \theta_r \in \mathcal{N}_r\},$$

1269 which contains the polynomial  $p_{1,1}$ . By Theorem B.14, the function space  $\mathcal{N}$  is a universal approxi-  
 1270 mator for the class of

$$\mathcal{N} := \{f_r \circ f_N \mid f_N \in \mathcal{B}_N, \theta_r \in \mathcal{B}_r\}.$$

1271 Recall that  $p_{1,F+1}$  is an  $(S_{N-1} \times S_F \times S_{C-1})$ -invariant function. By the same reasoning, we can  
 1272 define a function similar to  $q^{(F)}$  which is not  $(S_{F-1} \times S_C)$ -invariant but  $(S_F \times S_{C-1})$ -invariant

1273 instead. We can then follow up by approximating it using Lemma B.7 instead of Lemma B.6, such  
 1274 that by the same reasoning we can also approximate  $p_{1,F+1}$  using TSNet\*.

1275 Thus, there exists a TSNet\* in  $\mathcal{B}$ , denoted by  $f : \mathcal{K} \rightarrow \mathbb{R}^{N \times (F+C)}$ , such that

$$\sup_{\mathbf{X} \in \mathcal{K}} \|p(\mathbf{X}) - f(\mathbf{X})\|_{\infty} < \frac{\epsilon}{2}.$$

1276 Then, Equation (18) and the triangle inequality, we obtain

$$\sup_{\mathbf{X} \in \mathcal{K}} \|q(\mathbf{X}) - f(\mathbf{X})\|_{\infty} < \epsilon,$$

1277 which completes the proof.  $\square$

1278 **Note.** By applying same techniques in the proof of Lemma B.16, one can correctly prove Theorem 3  
 1279 of Maron et al. [2020].

1280 **Theorem 4.2.** Let  $K \subset \mathbb{R}^{N \times (F+C)}$  be a compact domain such that  $\mathcal{K} = \cup_{g \in S_N \times S_F \times S_C} gK$  and  
 1281  $\mathcal{K} \cap \mathcal{E} = \emptyset$ , where  $\mathcal{E} \subset \mathbb{R}^{N \times (F+C)}$  is the exclusion set corresponding to  $\mathbb{R}^{N \times (F+C)}$  (Definition B.15).  
 1282 Then, TSNet\* are universal approximators in  $L_{\infty}$  of continuous  $\mathcal{K} \rightarrow \mathbb{R}^{N \times C}$  functions that are  
 1283  $(S_N \times S_C)$ -equivariant and  $S_F$ -invariant.

1284 *Proof.* Let  $q : \mathbb{R}^{N \times (F+C)} \rightarrow \mathbb{R}^{N \times C}$  be a continuous  $S_N \times S_C$ -equivariant and  $S_F$ -invariant function  
 1285 on  $K$ . We define the lifted function  $q^* : \mathbb{R}^{N \times (F+C)} \rightarrow \mathbb{R}^{N \times (F+C)}$  by

$$q^*(\mathbf{X}) = [\mathbf{0}^{N \times F} \parallel q(\mathbf{X})] \in \mathbb{R}^{N \times (F+C)},$$

1286 where we pad  $q(\mathbf{X})$  with zeros in the first  $F$  columns. It is easy to verify that  $q^*$  is  $(S_F \times S_C \times S_N)$ -  
 1287 equivariant, as the  $S_F$  part of the group action acts only on the zero-padded section, and thus does  
 1288 not affect  $q(\mathbf{X})$ .

1289 By Lemma B.16, for any  $\varepsilon > 0$ , there exists a network TSNet\*, denoted by  $f_{\varepsilon}^* : \mathbb{R}^{N \times (F+C)} \rightarrow$   
 1290  $\mathbb{R}^{N \times (F+C)}$  such that

$$\|q^*(\mathbf{X}) - f_{\varepsilon}^*(\mathbf{X})\|_{\infty} < \varepsilon \quad \text{for all } \mathbf{X} \in \mathcal{K}.$$

1291 Consider the label projection map  $\pi$ , which satisfies

$$\pi(\mathbf{X}, \mathbf{Y}) = \mathbf{Y}, \quad \forall (\mathbf{X}, \mathbf{Y}) \in \mathbb{R}^{N \times F} \times \mathbb{R}^{N \times C}.$$

1292 Notice that  $q := \pi \circ q^*$  and that  $\pi \circ f_{\varepsilon}^*$  is a TSNet architecture, denoted by  $f_{\varepsilon} := \pi \circ f_{\varepsilon}^*$ .

1293 Thus, we get

$$\|q(\mathbf{X}) - f_{\varepsilon}(\mathbf{X})\|_{\infty} = \|\pi(q^*(\mathbf{X}) - f_{\varepsilon}^*(\mathbf{X}))\|_{\infty} \leq \|q^*(\mathbf{X}) - f_{\varepsilon}^*(\mathbf{X})\|_{\infty} < \varepsilon,$$

1294 for all  $\mathbf{X} \in \mathcal{K}$ . Hence, there exists a TSNet that approximates  $q$  on  $K$ .  $\square$

## 1295 C Further Details on the Experiments

### 1296 C.1 Dataset Statistics

1297 The statistics of the 28 node classification datasets used in Table 1 can be found in Table 2.

### 1298 C.2 Hyperparameters for all Experiments

1299 We adopt the hyperparameters used in Zhao et al. [2025] for the experiments in Table 1 over the  
 1300 architectures MeanGNN, GAT and GraphAny. The full set of hyperparameters is reported in Table 3.

Table 2: Statistics of the 28 node node classification datasets.

| Dataset        | #Nodes | #Edges  | #Feature | #Classes | Train/Val/Test Ratios (%) |
|----------------|--------|---------|----------|----------|---------------------------|
| actor          | 7600   | 30019   | 932      | 5        | 48.0/32.0/20.0            |
| amazon-ratings | 24492  | 186100  | 300      | 5        | 50.0/25.0/25.0            |
| Arxiv          | 169343 | 1166243 | 128      | 40       | 53.7/17.6/28.7            |
| blogcatalog    | 5196   | 343486  | 8189     | 6        | 2.3/48.8/48.8             |
| brazil         | 131    | 1074    | 131      | 4        | 61.1/19.1/19.8            |
| chameleon      | 2277   | 36101   | 2325     | 5        | 48.0/32.0/20.0            |
| citeseer       | 3327   | 9104    | 3703     | 6        | 3.6/15.0/30.1             |
| co-cs          | 18333  | 163788  | 6805     | 15       | 1.6/49.2/49.2             |
| co-physics     | 34493  | 495924  | 8415     | 5        | 0.3/49.9/49.9             |
| computers      | 13752  | 491722  | 767      | 10       | 1.5/49.3/49.3             |
| cora           | 2708   | 10556   | 1433     | 7        | 5.2/18.5/36.9             |
| cornell        | 183    | 554     | 1703     | 5        | 47.5/32.2/20.2            |
| deezer         | 28281  | 185504  | 128      | 2        | 0.1/49.9/49.9             |
| europa         | 399    | 5995    | 399      | 4        | 20.1/39.8/40.1            |
| full-DBLP      | 17716  | 105734  | 1639     | 4        | 0.5/49.8/49.8             |
| full-cora      | 19793  | 126842  | 8710     | 70       | 7.1/46.5/46.5             |
| last-fm-asia   | 7624   | 55612   | 128      | 18       | 4.7/47.6/47.6             |
| minesweeper    | 10000  | 78804   | 7        | 2        | 50.0/25.0/25.0            |
| photo          | 7650   | 238162  | 745      | 8        | 2.1/49.0/49.0             |
| pubmed         | 19717  | 88648   | 500      | 3        | 0.3/2.5/5.1               |
| questions      | 48921  | 307080  | 301      | 2        | 50.0/25.0/25.0            |
| roman-empire   | 22662  | 65854   | 300      | 18       | 50.0/25.0/25.0            |
| squirrel       | 5201   | 217073  | 2089     | 5        | 48.0/32.0/20.0            |
| texas          | 183    | 558     | 1703     | 5        | 47.5/31.7/20.2            |
| tolokers       | 11758  | 1038000 | 10       | 2        | 50.0/25.0/25.0            |
| usa            | 1190   | 13599   | 1190     | 4        | 6.7/46.6/46.6             |
| wiki           | 2405   | 17981   | 4973     | 17       | 14.1/42.9/43.0            |
| wiki-cs        | 11701  | 431206  | 300      | 10       | 5.0/15.1/49.9             |

Table 3: Hyperparameters used in Table 1.

|                          | MeanGNN                                             | GAT                                                 | GraphAny          | TS-Mean       | TS-GAT       |
|--------------------------|-----------------------------------------------------|-----------------------------------------------------|-------------------|---------------|--------------|
| lr                       | $2 \cdot 10^{-4}$<br>$5 \cdot 10^{-4}$<br>$10^{-3}$ | $2 \cdot 10^{-4}$<br>$5 \cdot 10^{-4}$<br>$10^{-3}$ | $2 \cdot 10^{-4}$ | 0.01          | 0.01<br>0.03 |
| hidden dimension         | 64, 128                                             | -                                                   | 64                | 16            | 16           |
| # layers                 | 1, 2, 3                                             | -                                                   | -                 | 2             | 2            |
| # batch                  | -                                                   | -                                                   | 500, 1000         | 5, 10         | 5, 10        |
| visible train labels (%) | -                                                   | -                                                   | 0.5               | 0.3, 0.4, 0.5 | 0.1, 0.2     |
| # epochs                 | 400                                                 | 400                                                 | 400               | 2000          | 2000         |
| Entropy                  | -                                                   | -                                                   | 1, 2              | -             | -            |
| # MLP layers             | -                                                   | -                                                   | 1                 | -             | -            |
